# Supplementary material
Source: PubMed Central journal article supplement (PMC4485619)
Supplement: NIHMS701659-supplement-supmat.pdf [file NIHMS701659-supplement-supmat.pdf]

**Supplementary Material for**  
**Steric and Electronic Control Over the Reactivity of a Thiolate–Ligated**  
**Fe(II) Complex with Dioxygen and Superoxide. Reversible  $\mu$ -oxo Dimer**  
**Formation.**

Roslyn M. Theisen, Jason Shearer, Werner Kaminsky,<sup>§</sup> and Julie A. Kovacs\*

**Supplementary Figures:**

**Figure S–1.** Electronic absorption spectrum of dimeric  $[(\text{Fe}^{\text{III}}(\text{S}^{\text{Me}_2}\text{N}_4(\text{tren}))_2(\mu\text{-O}))^{2+}]$  (**3**) in MeCN at ambient temperature.

**Figure S–2.** Electronic absorption spectrum of dimeric  $[(\text{Fe}^{\text{III}}(\text{S}^{\text{Me}_2}\text{N}_4(\text{tren}))_2(\mu\text{-O}))^{2+}]$  (**3**) in MeOH at ambient temperature.

**Figure S–3.** Electronic absorption spectrum showing the intermediate (with  $\lambda_{\text{max}} = 460$  nm) that forms in the reaction between  $[(\text{Fe}^{\text{II}}(\text{S}^{\text{Me}_2}\text{N}_4(\text{tren})))^+]$  (**1**) and dioxygen at low temperatures ( $-78$  °C) in MeOH. Upon warming to ambient temperature this intermediate converts to the  $\mu$ -oxo dimer, which has  $\lambda_{\text{max}} = 500$  nm in MeOH.

**Figure S–4.** Electronic absorption spectrum showing that the  $\mu$ -oxo bridge of dimeric  $[(\text{Fe}^{\text{III}}(\text{S}^{\text{Me}_2}\text{N}_4(\text{tren}))_2(\mu\text{-O}))^{2+}]$  (**3**) is cleaved upon the addition of 2 equiv of  $\text{HCl}_{(\text{aq})}$  in MeCN to cleanly afford monomeric  $[(\text{Fe}^{\text{III}}(\text{S}^{\text{Me}_2}\text{N}_4(\text{tren}))(\text{Cl}))^+]$  (**7**).

**Figure S–5.** Electronic absorption spectrum showing that the  $\mu$ -oxo bridge of dimeric  $[(\text{Fe}^{\text{III}}(\text{S}^{\text{Me}_2}\text{N}_4(\text{tren}))_2(\mu\text{-O}))^{2+}]$  (**3**) is cleaved upon the addition of 2 equiv of LutNHCl in MeCN to cleanly afford monomeric  $[(\text{Fe}^{\text{III}}(\text{S}^{\text{Me}_2}\text{N}_4(\text{tren}))(\text{Cl}))^+]$  (**7**).

**Figure S–6.** Electronic absorption spectrum showing that the  $\mu$ -oxo bridge of dimeric  $[(\text{Fe}^{\text{III}}(\text{S}^{\text{Me}_2}\text{N}_4(\text{tren}))_2(\mu\text{-O}))^{2+}]$  (**3**) is cleaved upon the addition of 2 equiv of anhydrous  $\text{HBF}_4$  in MeCN to cleanly afford monomeric  $[(\text{Fe}^{\text{III}}(\text{S}^{\text{Me}_2}\text{N}_4(\text{tren}))(\text{MeCN}))^{+2}]$  (**4**).

**Figure S–7.**  $1/\chi$  versus temperature (SQUID) plot for  $[(\text{Fe}^{\text{III}}(\text{S}^{\text{Me}_2}\text{N}_4(\text{tren}))_2(\mu\text{-O}))^{2+}]$  (**3**) showing the negative x-intercept, characteristic of an antiferromagnetically coupled system, and the estimated coupling constant  $J = -28$  cm<sup>-1</sup>.

**Figure S–8.**  $\mu_{\text{eff}}$  versus temperature plot for  $[(\text{Fe}^{\text{III}}(\text{S}^{\text{Me}_2}\text{N}_4(\text{tren}))_2(\mu\text{-O}))^{2+}]$  (**3**).

**Figure S–9.** <sup>1</sup>H NMR spectrum of  $[(\text{Fe}^{\text{II}}(\text{S}^{\text{Me}_2}\text{N}_4(\text{tren-Et}_4)))^+]$  (**5**) in CD<sub>3</sub>CN.

**Figure S–10.** Electronic Absorption spectrum of  $[(\text{Fe}^{\text{II}}(\text{S}^{\text{Me}_2}\text{N}_4(\text{tren-Et}_4)))^+]$  (**5**) in MeCN at ambient temperature.

**Supplementary Tables:**

**Table S-1.** Crystal Data for  $[(\text{Fe}^{\text{II}}(\text{S}^{\text{Me}_2}\text{N}_4(\text{tren-Et}_4)))(\text{PF}_6)]$  (**5**)

**Table S-2.** Positional and Equivalent Isotropic Thermal Parameters for  $[\text{Fe}^{\text{II}}(\text{S}^{\text{Me}_2}\text{N}_4(\text{tren-Et}_4))](\text{PF}_6)$  (**5**)

**Table S-3.** Bond Distances (Å) and Angles (deg) for  $[\text{Fe}^{\text{II}}(\text{S}^{\text{Me}_2}\text{N}_4(\text{tren-Et}_4))](\text{PF}_6)$  (**5**)

**Table S-4.** Anisotropic Thermal Parameters for  $[\text{Fe}^{\text{II}}(\text{S}^{\text{Me}_2}\text{N}_4(\text{tren-Et}_4))](\text{PF}_6)$  (**5**).

**Table S-5.** Hydrogen Atoms for  $[\text{Fe}^{\text{II}}(\text{S}^{\text{Me}_2}\text{N}_4(\text{tren-Et}_4))](\text{PF}_6)$  (**5**).

**Table S-6.** Crystal Data for  $[(\text{Fe}^{\text{III}}(\text{S}^{\text{Me}_2}\text{N}_4(\text{tren}))_2(\mu\text{-O}))](\text{PF}_6)_2 \cdot \text{MeCN}$  (**3**)

**Table S-7.** Positional and Equivalent Isotropic Thermal Parameters for  $[(\text{Fe}^{\text{III}}(\text{S}^{\text{Me}_2}\text{N}_4(\text{tren}))_2(\mu\text{-O}))](\text{PF}_6)_2 \cdot \text{MeCN}$  (**3**)

**Table S-8.** Bond Distances (Å) and Angles (deg) for  $[(\text{Fe}^{\text{III}}(\text{S}^{\text{Me}_2}\text{N}_4(\text{tren}))_2(\mu\text{-O}))](\text{PF}_6)_2 \cdot \text{MeCN}$  (**3**)

**Table S-9.** Anisotropic Thermal Parameters for  $[(\text{Fe}^{\text{III}}(\text{S}^{\text{Me}_2}\text{N}_4(\text{tren}))_2(\mu\text{-O}))](\text{PF}_6)_2 \cdot \text{MeCN}$  (**3**)

**Table S-10.** Hydrogen Atoms for  $[(\text{Fe}^{\text{III}}(\text{S}^{\text{Me}_2}\text{N}_4(\text{tren}))_2(\mu\text{-O}))](\text{PF}_6)_2 \cdot \text{MeCN}$  (**3**)

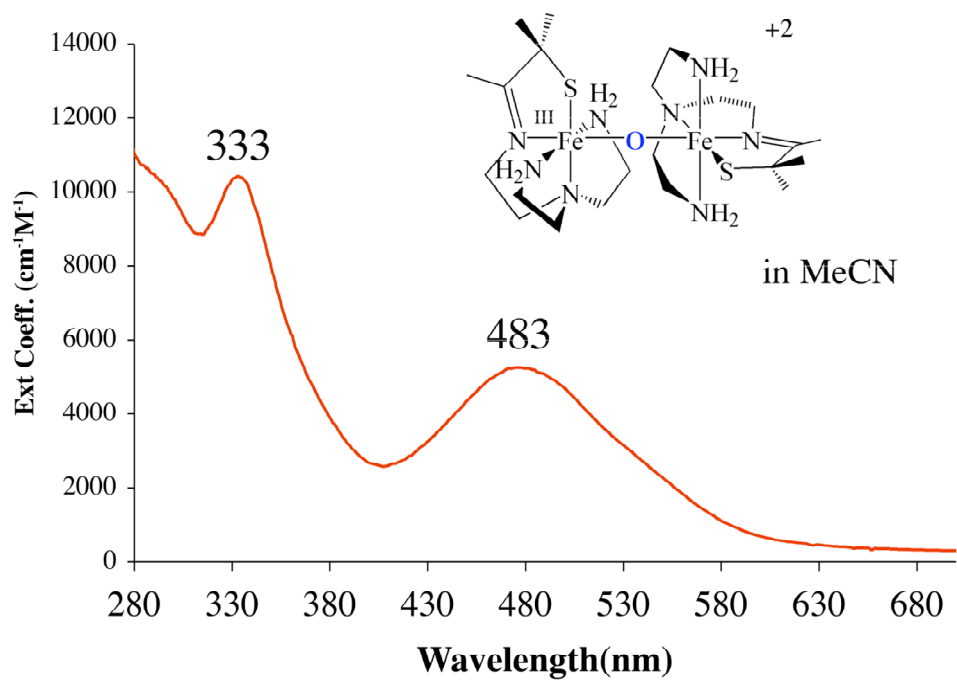

Figure S-1.

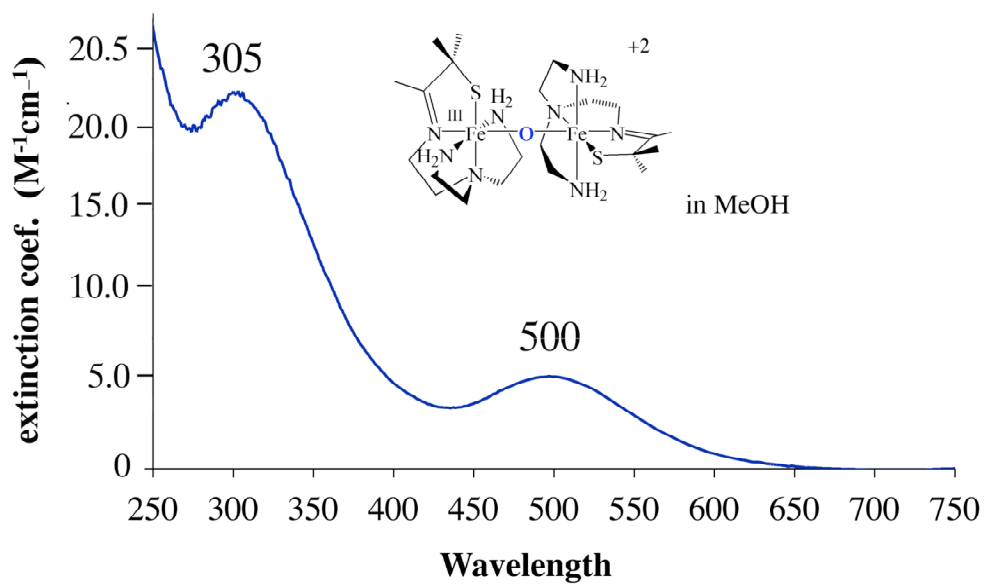

Figure S-2.

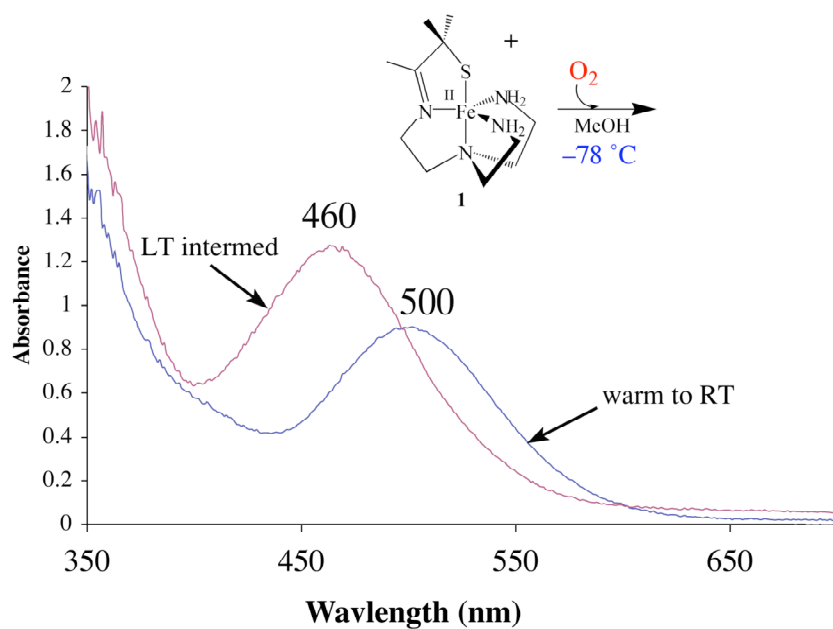

Figure S-3.

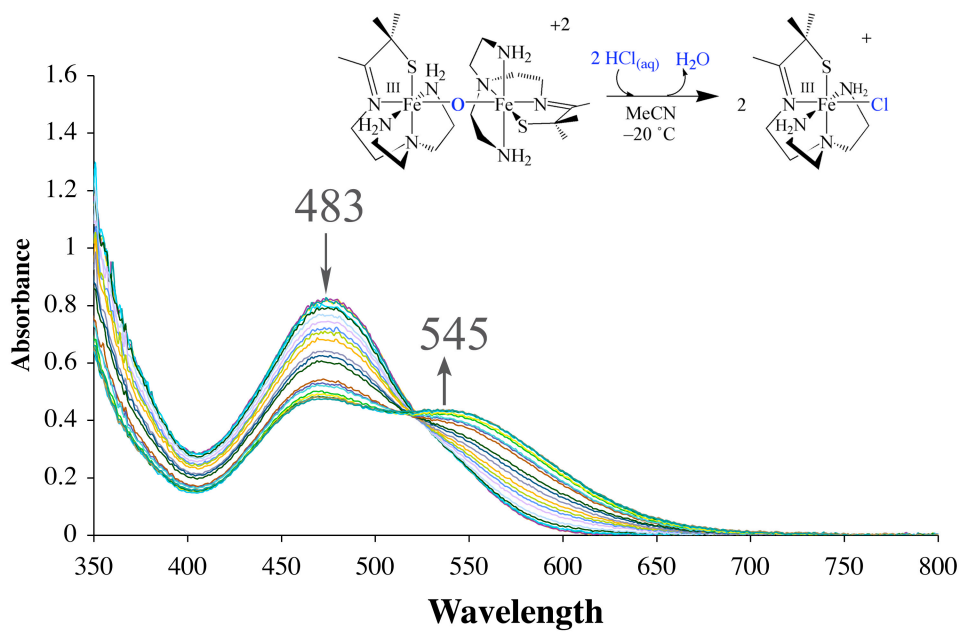

Figure S-4.

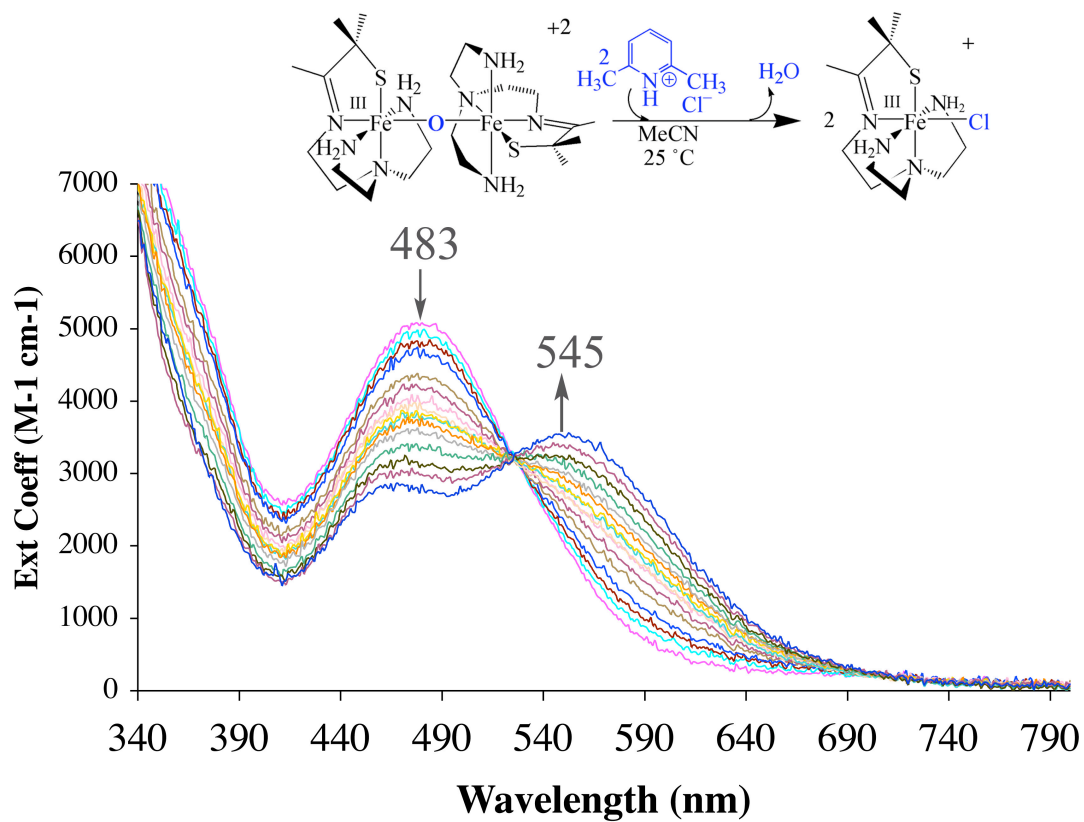

Figure S-5.

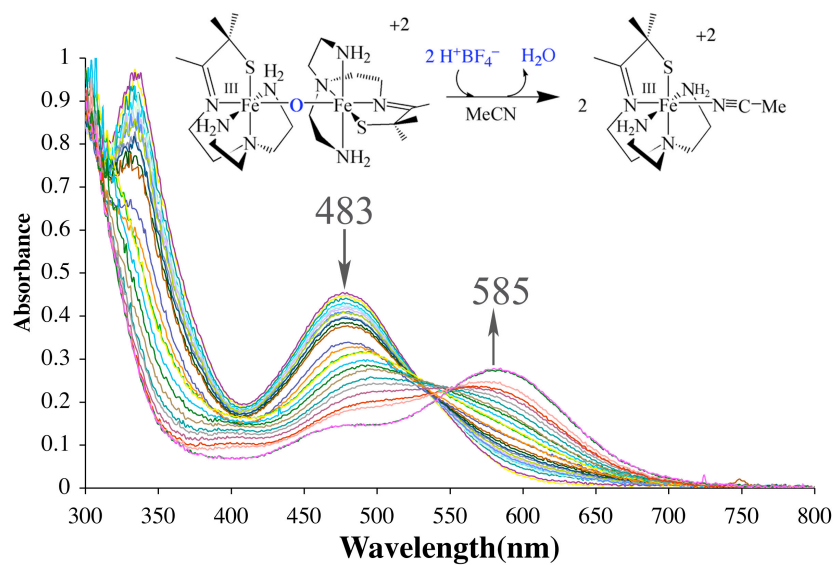

Figure S-6.

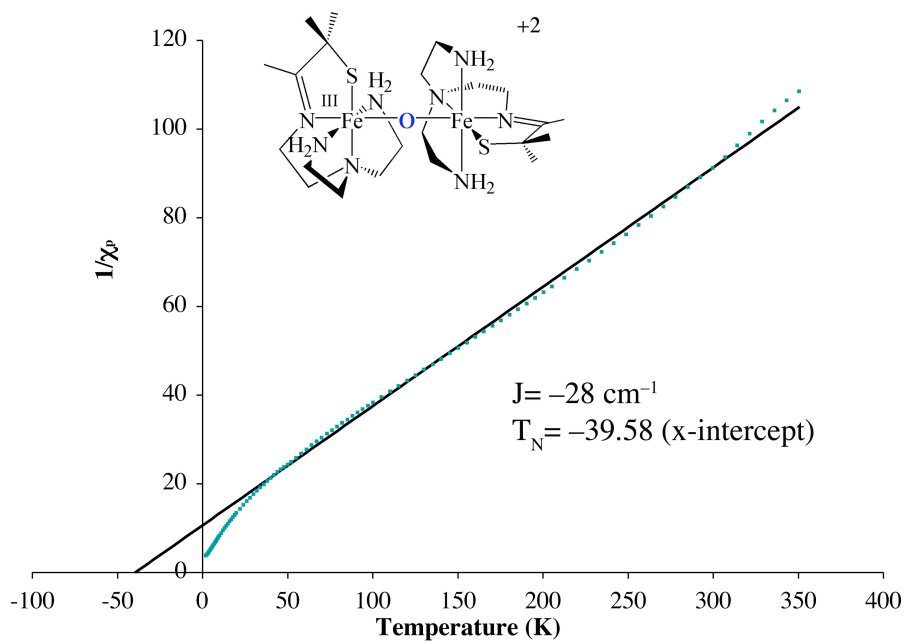

Figure S-7.

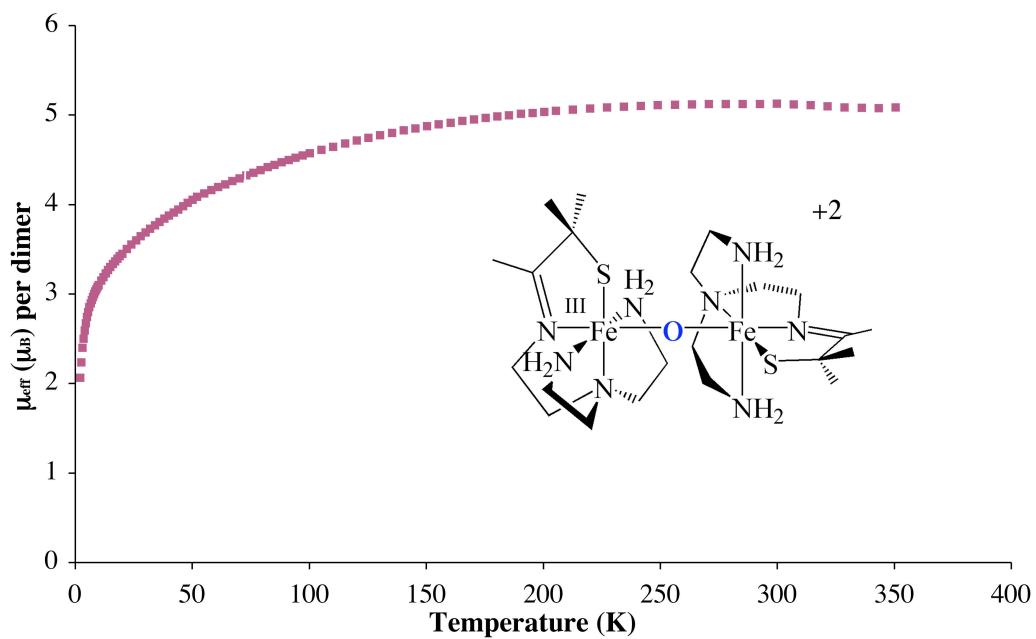

Figure S-8.

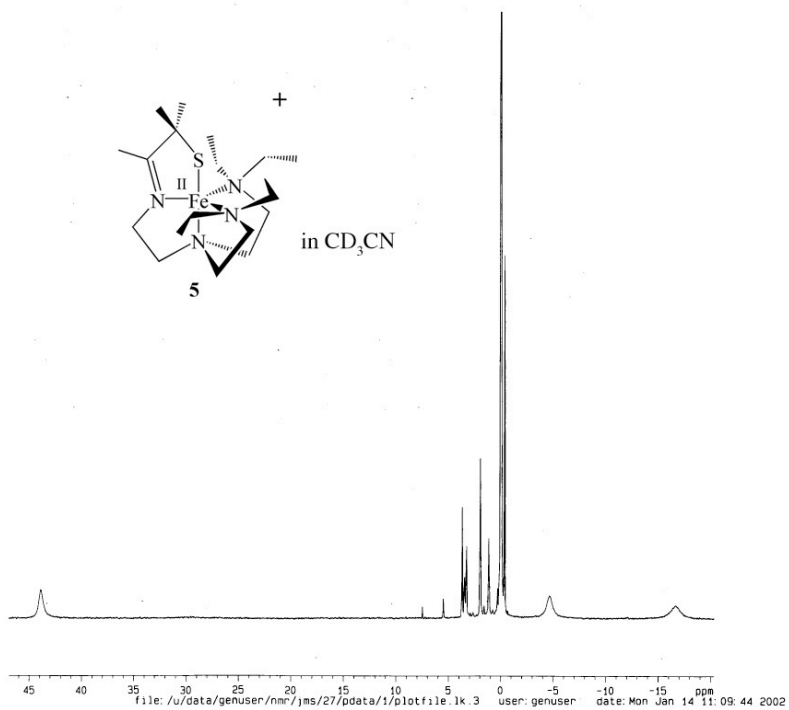**Figure S-9.**



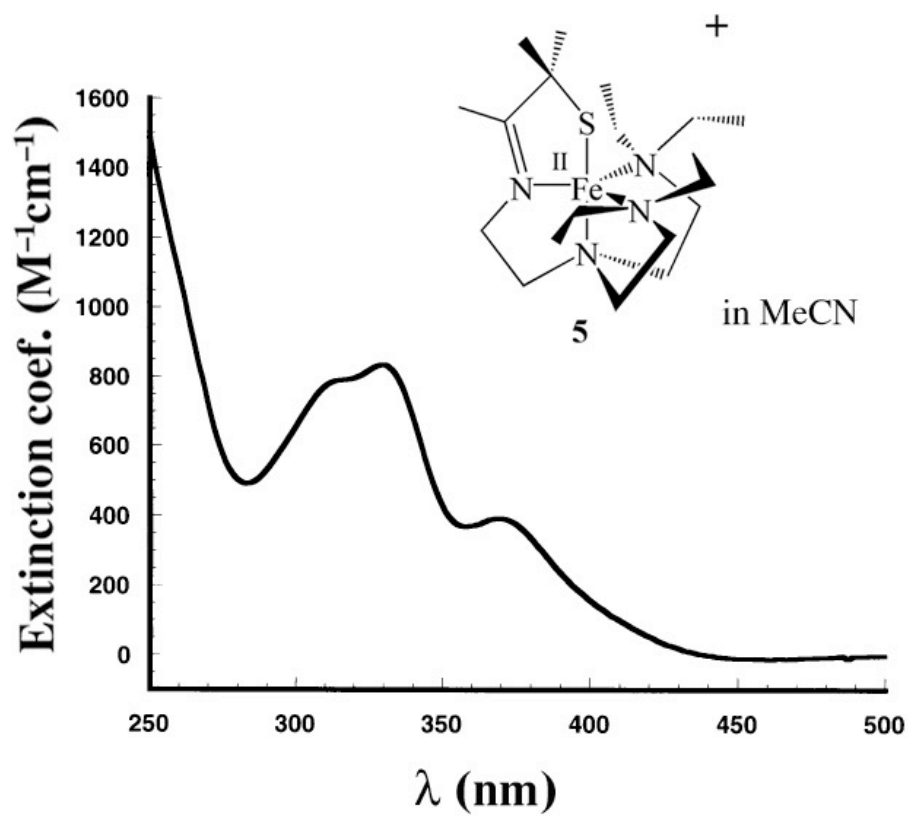

Figure S-10.

**Table S-1.** Crystal data and structure refinement for  
[Fe<sup>II</sup>(S<sup>Me</sup><sub>2</sub>N<sub>4</sub>(tren-Et<sub>4</sub>))](PF<sub>6</sub>) (**5**).

|                                   |                                                                                                                                |
|-----------------------------------|--------------------------------------------------------------------------------------------------------------------------------|
| Empirical formula                 | C19 H41 F6 Fe N4 P S                                                                                                           |
| Formula weight                    | 558.44                                                                                                                         |
| Temperature                       | 130(2) K                                                                                                                       |
| Wavelength                        | 0.71070 Å                                                                                                                      |
| Crystal description/color         | prism / yellowish clear                                                                                                        |
| Crystal system, space group       | Monoclinic, P c (No.7)                                                                                                         |
| Unit cell dimensions              | a = 8.4540(2)Å alpha = 90 deg.<br>b = 10.8940(3)Å beta = 106.1270(19) deg.<br>c = 14.4500(4)Å gamma = 90 deg.                  |
| Volume                            | 1278.44(6) Å <sup>3</sup>                                                                                                      |
| Z, Calculated density             | 2, 1.451 Mg/m <sup>3</sup>                                                                                                     |
| Absorption coefficient            | 0.792 mm <sup>-1</sup>                                                                                                         |
| F(000)                            | 588                                                                                                                            |
| Crystal size                      | 0.43 x 0.29 x 0.22 mm                                                                                                          |
| Reflections for indexing          | 627                                                                                                                            |
| Theta range for data collection   | 3.48 to 28.28 deg.                                                                                                             |
| Index ranges                      | -11<=h<=10, -13<=k<=14, -18<=l<=18                                                                                             |
| Reflections collected / unique    | 5300 / 5300 [R(int) = 0.013]                                                                                                   |
| Completeness to theta = 28.28     | 96.3%                                                                                                                          |
| Absorption correction             | HKL-Scalepack                                                                                                                  |
| Max. and min. transmission        | 0.8450 and 0.7270                                                                                                              |
| Refinement method                 | Full-matrix least-squares on F <sup>2</sup>                                                                                    |
| Data / restraints / parameters    | 5300 / 0 / 295                                                                                                                 |
| Goodness-of-fit on F <sup>2</sup> | S = 1.091; S = root(sum(w*D*D)/(n-p)),<br>where D = (Fo*Fo - Fc*Fc)                                                            |
| Final R indices [I>2sigma(I)]     | *R1 = 0.0406, wR2 = 0.1074                                                                                                     |
| R indices (all data)              | R1 = 0.0448, *wR2 = 0.1112<br>R1 = sum  Fo - Fc  /sum Fo , wR2=<br>root(sum(w*D*D)/sum(w*Fo*Fo)),<br>where D = (Fo*Fo - Fc*Fc) |
| Weighting scheme                  | calc<br>w=1/[\s^2^(Fo^2^)+(0.0663P)^2^+0.6198P]<br>where P=(Fo^2^+2Fc^2^)/3                                                    |
| Absolute structure parameter      | 0.5(3)                                                                                                                         |
| Largest diff. peak and hole       | 0.873 and -0.507 e.Å <sup>-3</sup>                                                                                             |

**Table S-2.** Atomic coordinates ( $\times 10^4$ ) and equivalent isotropic displacement parameters ( $\text{\AA}^2 \times 10^3$ ) for  $[\text{Fe}^{\text{II}}(\text{S}^{\text{Me}_2}\text{N}_4(\text{tren-Et}_4))](\text{PF}_6)$  (**5**).  $U(\text{eq})$  is defined as one third of the trace of the orthogonalized  $U_{ij}$  tensor.

|       | x        | y        | z       | U (eq) |
|-------|----------|----------|---------|--------|
| C(1)  | -1541(5) | -1079(3) | 5862(3) | 28(1)  |
| C(2)  | -3968(4) | -217(3)  | 4601(2) | 28(1)  |
| C(3)  | -2116(4) | -69(3)   | 5102(2) | 20(1)  |
| C(4)  | -1186(4) | -177(3)  | 4348(2) | 20(1)  |
| C(5)  | -1239(4) | -1409(3) | 3848(3) | 26(1)  |
| C(6)  | 587(4)   | 625(3)   | 3464(2) | 24(1)  |
| C(7)  | 866(4)   | 1917(3)  | 3135(2) | 24(1)  |
| C(8)  | 3193(4)  | 2541(3)  | 4468(2) | 22(1)  |
| C(9)  | 3589(4)  | 2974(3)  | 5500(2) | 22(1)  |
| C(10) | 1149(4)  | 4050(3)  | 3658(2) | 20(1)  |
| C(11) | -649(4)  | 4383(3)  | 3526(2) | 22(1)  |
| C(12) | 2925(4)  | 1077(3)  | 6252(2) | 21(1)  |
| C(13) | 4632(4)  | 828(3)   | 6923(2) | 28(1)  |
| C(14) | 2692(4)  | 3132(3)  | 6930(2) | 23(1)  |
| C(15) | 1826(5)  | 2610(3)  | 7636(2) | 27(1)  |
| C(16) | -3003(4) | 4008(3)  | 4136(2) | 25(1)  |
| C(17) | -3954(5) | 5192(4)  | 3768(3) | 34(1)  |
| C(18) | -553(4)  | 5094(3)  | 5122(2) | 23(1)  |
| C(19) | -1146(5) | 4975(3)  | 6022(3) | 28(1)  |
| N(3)  | 1440(3)  | 2755(2)  | 3965(2) | 20(1)  |
| N(2)  | -1178(3) | 4113(2)  | 4398(2) | 19(1)  |
| N(1)  | -362(3)  | 734(2)   | 4171(2) | 19(1)  |
| N(4)  | 2498(4)  | 2405(2)  | 6029(2) | 19(1)  |
| F(1)  | 2879(7)  | 1854(3)  | 782(3)  | 112(2) |
| F(2)  | 4575(5)  | 2342(3)  | 2190(2) | 66(1)  |
| F(3)  | 4943(6)  | 4213(3)  | 1565(3) | 93(1)  |
| F(4)  | 3128(4)  | 3713(2)  | 180(2)  | 51(1)  |
| F(5)  | 5294(7)  | 2535(5)  | 785(4)  | 114(2) |
| F(6)  | 2513(5)  | 3605(4)  | 1592(3) | 96(2)  |
| P(1)  | 3872(1)  | 3014(1)  | 1178(1) | 31(1)  |
| S(1)  | -1820(1) | 1428(1)  | 5725(1) | 27(1)  |
| Fe(1) | 0        | 2350(1)  | 5000    | 17(1)  |

**Table S-3.** Bond lengths [Å] and angles [deg] for  
 $[\text{Fe}^{\text{II}}(\text{S}^{\text{Me}_2}\text{N}_4(\text{tren-Et}_4))](\text{PF}_6)$  (**5**)

---

|              |           |
|--------------|-----------|
| N(3)-Fe(1)   | 2.219(3)  |
| N(2)-Fe(1)   | 2.227(3)  |
| N(1)-Fe(1)   | 2.104(3)  |
| N(4)-Fe(1)   | 2.220(3)  |
| S(1)-Fe(1)   | 2.3171(9) |
| C(1)-C(3)    | 1.535(4)  |
| C(1)-H(1A)   | 0.9800    |
| C(1)-H(1B)   | 0.9800    |
| C(1)-H(1C)   | 0.9800    |
| C(2)-C(3)    | 1.540(4)  |
| C(2)-H(2A)   | 0.9800    |
| C(2)-H(2B)   | 0.9800    |
| C(2)-H(2C)   | 0.9800    |
| C(3)-C(4)    | 1.516(4)  |
| C(3)-S(1)    | 1.845(3)  |
| C(4)-N(3)    | 1.278(4)  |
| C(4)-C(5)    | 1.519(4)  |
| C(5)-H(5A)   | 0.9800    |
| C(5)-H(5B)   | 0.9800    |
| C(5)-H(5C)   | 0.9800    |
| C(6)-N(3)    | 1.468(4)  |
| C(6)-C(7)    | 1.525(5)  |
| C(6)-H(6A)   | 0.9900    |
| C(6)-H(6B)   | 0.9900    |
| C(7)-N(1)    | 1.478(4)  |
| C(7)-H(7A)   | 0.9900    |
| C(7)-H(7B)   | 0.9900    |
| C(10)-N(3)   | 1.477(4)  |
| C(8)-C(9)    | 1.509(5)  |
| C(8)-H(8A)   | 0.9900    |
| C(8)-H(8B)   | 0.9900    |
| C(9)-N(4)    | 1.488(4)  |
| C(9)-H(9A)   | 0.9900    |
| C(9)-H(9B)   | 0.9900    |
| C(8)-N(3)    | 1.479(4)  |
| C(10)-C(11)  | 1.522(4)  |
| C(10)-H(10A) | 0.9900    |
| C(10)-H(10B) | 0.9900    |
| C(11)-N(2)   | 1.479(4)  |
| C(11)-H(11A) | 0.9900    |
| C(11)-H(11B) | 0.9900    |
| C(12)-N(4)   | 1.504(4)  |
| C(12)-C(13)  | 1.523(4)  |
| C(12)-H(12A) | 0.9900    |
| C(12)-H(12B) | 0.9900    |
| C(13)-H(13A) | 0.9800    |
| C(13)-H(13B) | 0.9800    |
| C(13)-H(13C) | 0.9800    |
| C(14)-N(4)   | 1.492(4)  |
| C(14)-C(15)  | 1.521(5)  |
| C(14)-H(14A) | 0.9900    |
| C(14)-H(14B) | 0.9900    |
| C(15)-H(15A) | 0.9800    |

Table S-3. (cont.)

|                       |           |
|-----------------------|-----------|
| C (15) -H (15B)       | 0.9800    |
| C (15) -H (15C)       | 0.9800    |
| C (16) -N (2)         | 1.487 (4) |
| C (16) -C (17)        | 1.534 (5) |
| C (16) -H (16A)       | 0.9900    |
| C (16) -H (16B)       | 0.9900    |
| C (17) -H (17A)       | 0.9800    |
| C (17) -H (17B)       | 0.9800    |
| C (17) -H (17C)       | 0.9800    |
| C (18) -N (2)         | 1.486 (4) |
| C (18) -C (19)        | 1.523 (5) |
| C (18) -H (18A)       | 0.9900    |
| C (18) -H (18B)       | 0.9900    |
| C (19) -H (19A)       | 0.9800    |
| C (19) -H (19B)       | 0.9800    |
| C (19) -H (19C)       | 0.9800    |
| F (1) -P (1)          | 1.537 (3) |
| F (2) -P (1)          | 1.595 (3) |
| F (3) -P (1)          | 1.598 (4) |
| F (4) -P (1)          | 1.597 (3) |
| F (5) -P (1)          | 1.556 (4) |
| F (6) -P (1)          | 1.573 (3) |
|                       |           |
| C (3) -C (1) -H (1A)  | 109.5     |
| C (3) -C (1) -H (1B)  | 109.5     |
| H (1A) -C (1) -H (1B) | 109.5     |
| C (3) -C (1) -H (1C)  | 109.5     |
| H (1A) -C (1) -H (1C) | 109.5     |
| H (1B) -C (1) -H (1C) | 109.5     |
| C (3) -C (2) -H (2A)  | 109.5     |
| C (3) -C (2) -H (2B)  | 109.5     |
| H (2A) -C (2) -H (2B) | 109.5     |
| C (3) -C (2) -H (2C)  | 109.5     |
| H (2A) -C (2) -H (2C) | 109.5     |
| H (2B) -C (2) -H (2C) | 109.5     |
| C (4) -C (3) -C (1)   | 109.5 (3) |
| C (4) -C (3) -C (2)   | 108.5 (3) |
| C (1) -C (3) -C (2)   | 109.9 (3) |
| C (4) -C (3) -S (1)   | 113.1 (2) |
| C (1) -C (3) -S (1)   | 108.1 (2) |
| C (2) -C (3) -S (1)   | 107.8 (2) |
| N (3) -C (4) -C (3)   | 120.3 (3) |
| N (3) -C (4) -C (5)   | 122.4 (3) |
| C (3) -C (4) -C (5)   | 117.3 (3) |
| C (4) -C (5) -H (5A)  | 109.5     |
| C (4) -C (5) -H (5B)  | 109.5     |
| H (5A) -C (5) -H (5B) | 109.5     |
| C (4) -C (5) -H (5C)  | 109.5     |
| H (5A) -C (5) -H (5C) | 109.5     |
| H (5B) -C (5) -H (5C) | 109.5     |
| N (3) -C (6) -C (7)   | 107.7 (3) |
| N (3) -C (6) -H (6A)  | 110.2     |
| C (7) -C (6) -H (6A)  | 110.2     |
| N (3) -C (6) -H (6B)  | 110.2     |
| C (7) -C (6) -H (6B)  | 110.2     |

Table S-3. (cont.)

|                          |           |
|--------------------------|-----------|
| H (6A) -C (6) -H (6B)    | 108.5     |
| N (1) -C (7) -C (6)      | 111.2 (3) |
| N (1) -C (7) -H (7A)     | 109.4     |
| C (6) -C (7) -H (7A)     | 109.4     |
| N (1) -C (7) -H (7B)     | 109.4     |
| C (6) -C (7) -H (7B)     | 109.4     |
| H (7A) -C (7) -H (7B)    | 108.0     |
| N (1) -C (8) -C (9)      | 110.7 (3) |
| N (1) -C (8) -H (8A)     | 109.5     |
| C (9) -C (8) -H (8A)     | 109.5     |
| N (1) -C (8) -H (8B)     | 109.5     |
| C (9) -C (8) -H (8B)     | 109.5     |
|                          |           |
| H (8A) -C (8) -H (8B)    | 108.1     |
| N (4) -C (9) -C (8)      | 112.3 (3) |
| N (4) -C (9) -H (9A)     | 109.1     |
| C (8) -C (9) -H (9A)     | 109.1     |
| N (4) -C (9) -H (9B)     | 109.1     |
| C (8) -C (9) -H (9B)     | 109.1     |
| H (9A) -C (9) -H (9B)    | 107.9     |
| N (1) -C (10) -C (11)    | 110.0 (2) |
| N (1) -C (10) -H (10A)   | 109.7     |
| C (11) -C (10) -H (10A)  | 109.7     |
| N (1) -C (10) -H (10B)   | 109.7     |
| C (11) -C (10) -H (10B)  | 109.7     |
| H (10A) -C (10) -H (10B) | 108.2     |
| N (2) -C (11) -C (10)    | 111.9 (2) |
| N (2) -C (11) -H (11A)   | 109.2     |
| C (10) -C (11) -H (11A)  | 109.2     |
| N (2) -C (11) -H (11B)   | 109.2     |
| C (10) -C (11) -H (11B)  | 109.2     |
| H (11A) -C (11) -H (11B) | 107.9     |
| N (4) -C (12) -C (13)    | 115.9 (3) |
| N (4) -C (12) -H (12A)   | 108.3     |
| C (13) -C (12) -H (12A)  | 108.3     |
| N (4) -C (12) -H (12B)   | 108.3     |
| C (13) -C (12) -H (12B)  | 108.3     |
| H (12A) -C (12) -H (12B) | 107.4     |
| C (12) -C (13) -H (13A)  | 109.5     |
| C (12) -C (13) -H (13B)  | 109.5     |
| H (13A) -C (13) -H (13B) | 109.5     |
| C (12) -C (13) -H (13C)  | 109.5     |
| H (13A) -C (13) -H (13C) | 109.5     |
| H (13B) -C (13) -H (13C) | 109.5     |
| N (4) -C (14) -C (15)    | 115.4 (3) |
| N (4) -C (14) -H (14A)   | 108.4     |
| C (15) -C (14) -H (14A)  | 108.4     |
| N (4) -C (14) -H (14B)   | 108.4     |
| C (15) -C (14) -H (14B)  | 108.4     |
| H (14A) -C (14) -H (14B) | 107.5     |
| C (14) -C (15) -H (15A)  | 109.5     |
| C (14) -C (15) -H (15B)  | 109.5     |
| H (15A) -C (15) -H (15B) | 109.5     |
| C (14) -C (15) -H (15C)  | 109.5     |
| H (15A) -C (15) -H (15C) | 109.5     |
| H (15B) -C (15) -H (15C) | 109.5     |

Table S-3. (cont.)

|                     |            |
|---------------------|------------|
| N(2)-C(16)-C(17)    | 115.5(3)   |
| N(2)-C(16)-H(16A)   | 108.4      |
| C(17)-C(16)-H(16A)  | 108.4      |
| N(2)-C(16)-H(16B)   | 108.4      |
| C(17)-C(16)-H(16B)  | 108.4      |
| H(16A)-C(16)-H(16B) | 107.5      |
| C(16)-C(17)-H(17A)  | 109.5      |
| C(16)-C(17)-H(17B)  | 109.5      |
| H(17A)-C(17)-H(17B) | 109.5      |
| C(16)-C(17)-H(17C)  | 109.5      |
| H(17A)-C(17)-H(17C) | 109.5      |
| H(17B)-C(17)-H(17C) | 109.5      |
| N(2)-C(18)-C(19)    | 113.8(3)   |
| N(2)-C(18)-H(18A)   | 108.8      |
| C(19)-C(18)-H(18A)  | 108.8      |
| N(2)-C(18)-H(18B)   | 108.8      |
| C(19)-C(18)-H(18B)  | 108.8      |
| H(18A)-C(18)-H(18B) | 107.7      |
| C(18)-C(19)-H(19A)  | 109.5      |
| C(18)-C(19)-H(19B)  | 109.5      |
| H(19A)-C(19)-H(19B) | 109.5      |
| C(18)-C(19)-H(19C)  | 109.5      |
| H(19A)-C(19)-H(19C) | 109.5      |
| H(19B)-C(19)-H(19C) | 109.5      |
| C(7)-N(3)-C(10)     | 110.9(2)   |
| C(7)-N(3)-C(8)      | 111.1(3)   |
| C(10)-N(3)-C(8)     | 111.0(2)   |
| C(7)-N(3)-Fe(1)     | 107.82(19) |
| C(10)-N(3)-Fe(1)    | 108.38(19) |
| C(8)-N(3)-Fe(1)     | 107.48(18) |
| C(11)-N(2)-C(18)    | 108.9(2)   |
| C(11)-N(2)-C(16)    | 109.7(2)   |
| C(18)-N(2)-C(16)    | 112.1(3)   |
| C(11)-N(2)-Fe(1)    | 107.22(18) |
| C(18)-N(2)-Fe(1)    | 108.20(18) |
| C(16)-N(2)-Fe(1)    | 110.64(19) |
| C(4)-N(1)-C(6)      | 120.7(3)   |
| C(4)-N(1)-Fe(1)     | 122.4(2)   |
| C(6)-N(1)-Fe(1)     | 116.27(19) |
| C(9)-N(4)-C(14)     | 107.1(2)   |
| C(9)-N(4)-C(12)     | 111.4(3)   |
| C(14)-N(4)-C(12)    | 111.2(2)   |
| C(9)-N(4)-Fe(1)     | 106.06(18) |
| C(14)-N(4)-Fe(1)    | 116.9(2)   |
| C(12)-N(4)-Fe(1)    | 104.14(18) |
| F(1)-P(1)-F(5)      | 89.2(3)    |
| F(1)-P(1)-F(6)      | 95.6(3)    |
| F(5)-P(1)-F(6)      | 175.2(3)   |
| F(1)-P(1)-F(2)      | 89.4(2)    |
| F(5)-P(1)-F(2)      | 93.0(2)    |
| F(6)-P(1)-F(2)      | 88.00(19)  |
| F(1)-P(1)-F(4)      | 91.04(19)  |
| F(5)-P(1)-F(4)      | 88.8(2)    |
| F(6)-P(1)-F(4)      | 90.12(16)  |
| F(2)-P(1)-F(4)      | 178.10(18) |
| F(1)-P(1)-F(3)      | 178.0(3)   |

Table S-3. (cont.)

|                 |            |
|-----------------|------------|
| F(5)-P(1)-F(3)  | 89.0(3)    |
| F(6)-P(1)-F(3)  | 86.3(3)    |
| F(2)-P(1)-F(3)  | 91.3(2)    |
| F(4)-P(1)-F(3)  | 88.27(19)  |
| C(3)-S(1)-Fe(1) | 100.34(10) |
| N(3)-Fe(1)-N(1) | 78.63(10)  |
| N(1)-Fe(1)-N(4) | 111.43(10) |
| N(3)-Fe(1)-N(4) | 81.28(10)  |
| N(1)-Fe(1)-N(2) | 121.40(10) |
| N(3)-Fe(1)-N(2) | 80.48(10)  |
| N(4)-Fe(1)-N(2) | 118.49(9)  |
| N(1)-Fe(1)-S(1) | 83.41(7)   |
| N(3)-Fe(1)-S(1) | 161.53(7)  |
| N(4)-Fe(1)-S(1) | 109.64(7)  |
| N(2)-Fe(1)-S(1) | 105.63(8)  |

---



**Table S-4.** Anisotropic displacement parameters ( $\text{Å}^2 \times 10^3$ ) for  $[\text{Fe}^{\text{II}}(\text{S}^{\text{Me}_2}\text{N}_4(\text{tren-Et}_4))](\text{PF}_6)$  (**5**). The anisotropic displacement factor exponent takes the form:  $-2 \pi^2 [h^2 a^{*2} U_{11} + \dots + 2 h k a^* b^* U_{12}]$

|        | U11     | U22     | U33     | U23    | U13     | U12     |
|--------|---------|---------|---------|--------|---------|---------|
| C (1)  | 36 (2)  | 22 (2)  | 27 (2)  | 7 (1)  | 9 (1)   | 1 (1)   |
| C (2)  | 21 (2)  | 37 (2)  | 26 (2)  | -5 (1) | 6 (1)   | -3 (1)  |
| C (3)  | 21 (2)  | 18 (1)  | 20 (1)  | 1 (1)  | 5 (1)   | -1 (1)  |
| C (4)  | 21 (2)  | 19 (1)  | 19 (1)  | 1 (1)  | 4 (1)   | -2 (1)  |
| C (5)  | 31 (2)  | 16 (2)  | 34 (2)  | -4 (1) | 13 (1)  | -5 (1)  |
| C (6)  | 30 (2)  | 21 (2)  | 27 (2)  | -6 (1) | 16 (1)  | -3 (1)  |
| C (7)  | 28 (2)  | 26 (2)  | 20 (2)  | -6 (1) | 12 (1)  | -6 (1)  |
| C (8)  | 16 (2)  | 27 (2)  | 26 (2)  | 4 (1)  | 10 (1)  | -1 (1)  |
| C (9)  | 17 (2)  | 24 (2)  | 26 (2)  | 5 (1)  | 7 (1)   | -3 (1)  |
| C (10) | 26 (2)  | 17 (1)  | 19 (1)  | 2 (1)  | 9 (1)   | -2 (1)  |
| C (11) | 27 (2)  | 20 (1)  | 19 (1)  | 4 (1)  | 6 (1)   | -1 (1)  |
| C (12) | 22 (2)  | 21 (1)  | 19 (1)  | 2 (1)  | 5 (1)   | -3 (1)  |
| C (13) | 30 (2)  | 26 (2)  | 26 (2)  | 3 (1)  | 2 (1)   | 3 (1)   |
| C (14) | 26 (2)  | 20 (2)  | 22 (2)  | -1 (1) | 4 (1)   | -3 (1)  |
| C (15) | 35 (2)  | 26 (2)  | 19 (2)  | -3 (1) | 8 (1)   | -2 (1)  |
| C (16) | 19 (2)  | 26 (2)  | 28 (2)  | 2 (1)  | 4 (1)   | -2 (1)  |
| C (17) | 24 (2)  | 33 (2)  | 43 (2)  | 12 (2) | 6 (1)   | 6 (1)   |
| C (18) | 27 (2)  | 19 (2)  | 24 (2)  | -1 (1) | 6 (1)   | -2 (1)  |
| C (19) | 29 (2)  | 32 (2)  | 26 (2)  | -4 (1) | 10 (1)  | 2 (1)   |
| N (3)  | 24 (2)  | 17 (1)  | 19 (1)  | 0 (1)  | 4 (1)   | -1 (1)  |
| N (2)  | 20 (1)  | 19 (1)  | 19 (1)  | 0 (1)  | 5 (1)   | -1 (1)  |
| N (1)  | 23 (1)  | 17 (1)  | 19 (1)  | -2 (1) | 9 (1)   | -1 (1)  |
| N (4)  | 21 (1)  | 17 (1)  | 18 (1)  | 1 (1)  | 4 (1)   | -3 (1)  |
| F (1)  | 152 (4) | 51 (2)  | 85 (3)  | 18 (2) | -44 (3) | -48 (2) |
| F (2)  | 93 (3)  | 39 (2)  | 50 (2)  | 7 (1)  | -8 (2)  | 23 (1)  |
| F (3)  | 120 (4) | 64 (2)  | 85 (3)  | 0 (2)  | 10 (2)  | -38 (2) |
| F (4)  | 71 (2)  | 45 (2)  | 46 (2)  | 17 (1) | 28 (1)  | 24 (1)  |
| F (5)  | 114 (4) | 138 (4) | 101 (3) | 12 (3) | 50 (3)  | 91 (3)  |
| F (6)  | 108 (3) | 119 (3) | 87 (3)  | 61 (2) | 72 (2)  | 77 (3)  |
| P (1)  | 34 (1)  | 23 (1)  | 39 (1)  | 3 (1)  | 12 (1)  | 10 (1)  |
| S (1)  | 34 (1)  | 22 (1)  | 30 (1)  | -5 (1) | 19 (1)  | -9 (1)  |
| Fe (1) | 19 (1)  | 16 (1)  | 16 (1)  | 0 (1)  | 6 (1)   | -2 (1)  |

**Table S-5.** Hydrogen coordinates ( $\times 10^4$ ) and isotropic displacement parameters ( $\text{Å}^2 \times 10^3$ ) for  $[\text{Fe}^{\text{II}}(\text{S}^{\text{Me}_2}\text{N}_4(\text{tren-Et}_4))](\text{PF}_6)$  (**5**).

|        | x     | y     | z    | U(eq) |
|--------|-------|-------|------|-------|
| H(1A)  | -1905 | -1880 | 5572 | 43    |
| H(1B)  | -2013 | -934  | 6399 | 43    |
| H(1C)  | -336  | -1067 | 6099 | 43    |
| H(2A)  | -4320 | 415   | 4104 | 42    |
| H(2B)  | -4590 | -130  | 5077 | 42    |
| H(2C)  | -4171 | -1031 | 4303 | 42    |
| H(5A)  | -1563 | -1286 | 3148 | 40    |
| H(5B)  | -2041 | -1944 | 4024 | 40    |
| H(5C)  | -147  | -1791 | 4048 | 40    |
| H(6A)  | -28   | 126   | 2908 | 29    |
| H(6B)  | 1656  | 220   | 3761 | 29    |
| H(7A)  | 1696  | 1888  | 2769 | 28    |
| H(7B)  | -174  | 2234  | 2701 | 28    |
| H(8A)  | 3891  | 2987  | 4131 | 27    |
| H(8B)  | 3442  | 1654  | 4455 | 27    |
| H(9A)  | 4748  | 2770  | 5833 | 26    |
| H(9B)  | 3470  | 3878  | 5508 | 26    |
| H(10A) | 1431  | 4173  | 3044 | 24    |
| H(10B) | 1863  | 4592  | 4150 | 24    |
| H(11A) | -808  | 5269  | 3373 | 26    |
| H(11B) | -1347 | 3916  | 2975 | 26    |
| H(12A) | 2828  | 642   | 5637 | 25    |
| H(12B) | 2099  | 719   | 6543 | 25    |
| H(13A) | 5468  | 1161  | 6640 | 43    |
| H(13B) | 4792  | -59   | 7016 | 43    |
| H(13C) | 4733  | 1223  | 7547 | 43    |
| H(14A) | 2269  | 3971  | 6749 | 27    |
| H(14B) | 3882  | 3202  | 7263 | 27    |
| H(15A) | 660   | 2475  | 7303 | 40    |
| H(15B) | 1921  | 3191  | 8166 | 40    |
| H(15C) | 2338  | 1829  | 7892 | 40    |
| H(16A) | -3322 | 3723  | 4710 | 30    |
| H(16B) | -3350 | 3369  | 3633 | 30    |
| H(17A) | -3765 | 5790  | 4293 | 51    |
| H(17B) | -5133 | 5009  | 3534 | 51    |
| H(17C) | -3571 | 5532  | 3240 | 51    |
| H(18A) | -906  | 5900  | 4819 | 28    |
| H(18B) | 665   | 5076  | 5314 | 28    |
| H(19A) | -2337 | 5114  | 5853 | 43    |
| H(19B) | -585  | 5585  | 6499 | 43    |
| H(19C) | -896  | 4150  | 6293 | 43    |

**Table S-6.** Crystal data and structure refinement for  
 $[(\text{Fe}^{\text{III}}(\text{S}^{\text{Me}_2}\text{N}_4(\text{tren}))_2(\mu\text{-O}))(\text{PF}_6)_2 \cdot \text{MeCN} (3)]$ .

|                                   |                                                                                                                               |
|-----------------------------------|-------------------------------------------------------------------------------------------------------------------------------|
| Empirical formula                 | C24 H53 F12 Fe2 N9 O P2 S2                                                                                                    |
| Formula weight                    | 949.51                                                                                                                        |
| Temperature                       | 130(2) K                                                                                                                      |
| Wavelength                        | 0.71070 Å                                                                                                                     |
| Crystal description/color         | plate / dark-red                                                                                                              |
| Crystal system, space group       | Monoclinic, P 21/c (No.14)                                                                                                    |
| Unit cell dimensions              | a = 12.6470(9)Å alpha = 90.000(10) deg.<br>b = 17.004(2)Å beta = 91.455(7) deg.<br>c = 36.359(5)Å gamma = 90.000(10) deg.     |
| Volume                            | 7816.5(16) Å <sup>3</sup>                                                                                                     |
| Z, Calculated density             | 8, 1.614 Mg/m <sup>3</sup>                                                                                                    |
| Absorption coefficient            | 1.023 mm <sup>-1</sup>                                                                                                        |
| F(000)                            | 3920                                                                                                                          |
| Crystal size                      | 0.41 x 0.24 x 0.05 mm                                                                                                         |
| Reflections for indexing          | 373                                                                                                                           |
| Theta range for data collection   | 5.14 to 26.37 deg.                                                                                                            |
| Index ranges                      | -11<=h<=11, -21<=k<=20, -45<=l<=45                                                                                            |
| Reflections collected/unique      | 19377 / 12010 [R(int) = 0.1519]                                                                                               |
| Completeness to theta             | 26.37 72.6%                                                                                                                   |
| Absorption correction             | HKL-SCALEPACK                                                                                                                 |
| Max. and min. transmission        | 0.9506 and 0.6790                                                                                                             |
| Refinement method                 | Full-matrix least-squares on F <sup>2</sup>                                                                                   |
| Data/restraints/parameters        | 12010 / 0 / 947                                                                                                               |
| Goodness-of-fit on F <sup>2</sup> | S = 0.949<br>S = root(sum(w*D*D)/(n-p)), where D =<br>(Fo*Fo - Fc*Fc)                                                         |
| Final R indices [I>2sigma(I)]     | *R1 = 0.1108, wR2 = 0.2369                                                                                                    |
| R indices (all data)              | R1 = 0.2320, *wR2 = 0.2882<br>R1 = sum  Fo - Fc  /sum Fo ,<br>wR2=root(sum(w*D*D)/sum(w*Fo*Fo)),<br>where D = (Fo*Fo - Fc*Fc) |
| Weighting scheme                  | calc<br>w=1/[\s^2^(Fo^2^)+(0.1369P)^2^+0.0000<br>P] where P=(Fo^2^+2Fc^2^)/3                                                  |
| Extinction coefficient            | 0.0051(7)                                                                                                                     |
| Largest diff. peak and hole       | 1.301 and -0.675 e.Å <sup>-3</sup>                                                                                            |

**Table S-7.** Atomic coordinates ( $\times 10^4$ ) and equivalent isotropic displacement parameters ( $\text{\AA}^2 \times 10^3$ ) for  $[(\text{Fe}^{\text{III}}(\text{S}^{\text{Me}_2}\text{N}_4(\text{tren}))_2(\mu\text{-O}))(\text{PF}_6)_2 \cdot \text{MeCN}] (\mathbf{3})$ .  $U(\text{eq})$  is defined as one third of the trace of the orthogonalized  $U_{ij}$  tensor.

|       | x         | y        | z       | U(eq) |
|-------|-----------|----------|---------|-------|
| C(1)  | 1572(11)  | 1205(8)  | 5090(3) | 43(4) |
| C(2)  | 248(11)   | 721(7)   | 4585(4) | 42(4) |
| C(3)  | 929(9)    | 1451(7)  | 4749(3) | 26(3) |
| C(4)  | 128(10)   | 2095(8)  | 4842(3) | 36(3) |
| C(5)  | -678(10)  | 1919(8)  | 5133(4) | 44(4) |
| C(6)  | -694(10)  | 3340(8)  | 4737(4) | 40(4) |
| C(7)  | -385(12)  | 4129(8)  | 4592(4) | 47(4) |
| C(8)  | -874(13)  | 3414(9)  | 3788(5) | 61(5) |
| C(9)  | -406(13)  | 4133(10) | 3910(5) | 63(5) |
| C(10) | 1909(12)  | 4603(8)  | 4549(5) | 63(5) |
| C(11) | 1031(11)  | 4709(7)  | 4247(4) | 48(4) |
| C(12) | 6128(10)  | 4360(9)  | 3984(3) | 43(4) |
| C(13) | 5232(12)  | 5221(9)  | 3511(4) | 61(5) |
| C(14) | 5285(9)   | 4433(8)  | 3683(3) | 29(3) |
| C(15) | 5459(11)  | 3729(9)  | 3406(3) | 38(4) |
| C(16) | 6502(11)  | 3763(9)  | 3222(4) | 52(4) |
| C(17) | 4952(11)  | 2596(8)  | 3077(4) | 47(4) |
| C(18) | 3910(10)  | 2316(8)  | 2873(3) | 34(3) |
| C(19) | 2102(10)  | 2682(8)  | 2892(4) | 36(3) |
| C(20) | 2304(11)  | 3557(8)  | 2793(3) | 39(4) |
| C(21) | 3550(13)  | 1395(8)  | 3578(4) | 54(4) |
| C(22) | 2678(13)  | 1602(7)  | 3287(4) | 55(4) |
| C(23) | 10894(10) | 4262(7)  | 1051(4) | 36(3) |

**Table S-7 (cont.) .**

|        |            |           |          |        |
|--------|------------|-----------|----------|--------|
| C (24) | 10133 (12) | 5101 (8)  | 1553 (4) | 56 (4) |
| C (25) | 10100 (9)  | 4300 (7)  | 1351 (4) | 30 (3) |
| C (26) | 10344 (12) | 3653 (9)  | 1633 (3) | 44 (4) |
| C (27) | 11447 (10) | 3554 (11) | 1790 (4) | 60 (5) |
| C (28) | 9819 (11)  | 2437 (9)  | 1945 (4) | 49 (4) |
| C (29) | 8786 (11)  | 2167 (8)  | 2112 (4) | 38 (3) |
| C (30) | 7109 (12)  | 3326 (9)  | 2224 (3) | 52 (4) |
| C (31) | 6923 (11)  | 2474 (9)  | 2082 (4) | 51 (4) |
| C (32) | 8422 (13)  | 1370 (7)  | 1372 (4) | 50 (4) |
| C (33) | 7575 (12)  | 1509 (7)  | 1664 (4) | 45 (4) |
| C (34) | 4762 (11)  | 900 (8)   | 313 (5)  | 58 (4) |
| C (35) | 6413 (10)  | 1270 (7)  | -37 (3)  | 36 (3) |
| C (36) | 5601 (9)   | 1550 (7)  | 247 (3)  | 27 (3) |
| C (37) | 5032 (9)   | 2282 (7)  | 111 (3)  | 28 (3) |
| C (38) | 4545 (11)  | 2260 (8)  | -274 (4) | 47 (4) |
| C (39) | 4571 (10)  | 3630 (7)  | 172 (3)  | 34 (3) |
| C (40) | 4341 (10)  | 4216 (7)  | 471 (3)  | 30 (3) |
| C (41) | 6655 (12)  | 4563 (7)  | 462 (4)  | 49 (4) |
| C (42) | 5964 (9)   | 4749 (7)  | 768 (3)  | 29 (3) |
| C (43) | 3940 (13)  | 3519 (9)  | 1228 (4) | 54 (4) |
| C (44) | 4572 (10)  | 4238 (7)  | 1155 (3) | 31 (3) |
| C (45) | 2642 (11)  | 1262 (8)  | 1984 (4) | 49 (4) |
| C (46) | 3500 (11)  | 1797 (9)  | 1957 (4) | 41 (4) |
| C (47) | 2190 (13)  | 6263 (9)  | 2015 (4) | 58 (5) |
| C (48) | 1249 (15)  | 6725 (8)  | 1964 (4) | 49 (4) |
| N (3)  | 2152 (8)   | 3754 (6)  | 4567 (3) | 34 (3) |
| N (2)  | 239 (8)    | 4102 (6)  | 4248 (3) | 34 (3) |
| N (1)  | 147 (8)    | 2757 (6)  | 4671 (2) | 26 (2) |

**Table S-7 (cont.) .**

|       |           |           |          |         |
|-------|-----------|-----------|----------|---------|
| N(4)  | -196 (7)  | 2746 (6)  | 3850 (3) | 35 (3)  |
| N(5)  | 3792 (8)  | 2102 (6)  | 3819 (3) | 33 (3)  |
| N(6)  | 2571 (8)  | 3982 (6)  | 3131 (3) | 35 (3)  |
| N(7)  | 4745 (8)  | 3250 (6)  | 3327 (3) | 28 (2)  |
| N(8)  | 3002 (9)  | 2386 (6)  | 3118 (3) | 40 (3)  |
| N(9)  | 8566 (9)  | 2110 (6)  | 1161 (3) | 45 (3)  |
| N(10) | 7475 (8)  | 3819 (6)  | 1926 (3) | 39 (3)  |
| N(11) | 9610 (8)  | 3141 (6)  | 1701 (3) | 31 (3)  |
| N(12) | 7853 (9)  | 2233 (6)  | 1877 (3) | 32 (3)  |
| N(13) | 6999 (7)  | 3737 (5)  | 482 (3)  | 29 (2)  |
| N(14) | 5107 (8)  | 4161 (5)  | 791 (3)  | 27 (2)  |
| N(15) | 5054 (7)  | 2903 (6)  | 307 (3)  | 25 (2)  |
| N(16) | 4540 (8)  | 2783 (6)  | 1146 (3) | 35 (3)  |
| N(17) | 4244 (11) | 2188 (8)  | 1923 (4) | 63 (4)  |
| N(18) | 472 (14)  | 7049 (10) | 1925 (4) | 94 (6)  |
| O(1)  | 1990 (6)  | 3165 (4)  | 3816 (2) | 35 (2)  |
| O(2)  | 6733 (6)  | 3131 (4)  | 1231 (2) | 32 (2)  |
| F(1)  | 8879 (10) | 5198 (9)  | 2432 (3) | 132 (6) |
| F(2)  | 10630 (8) | 5088 (5)  | 2550 (3) | 96 (4)  |
| F(3)  | 10261 (9) | 4444 (9)  | 3039 (3) | 140 (6) |
| F(4)  | 8541 (7)  | 4606 (6)  | 2929 (4) | 104 (4) |
| F(5)  | 9549 (7)  | 5616 (7)  | 2957 (4) | 137 (6) |
| F(6)  | 9616 (8)  | 4087 (6)  | 2495 (3) | 109 (4) |
| F(7)  | 2632 (8)  | 5745 (6)  | 563 (4)  | 120 (5) |
| F(8)  | 4195 (6)  | 6214 (6)  | 767 (4)  | 107 (4) |
| F(9)  | 3418 (8)  | 7269 (7)  | 911 (4)  | 132 (5) |
| F(10) | 1807 (7)  | 6768 (6)  | 746 (3)  | 89 (3)  |
| F(11) | 3111 (8)  | 6847 (9)  | 370 (3)  | 126 (5) |

Table S-7 (cont.).

|       |           |           |          |          |
|-------|-----------|-----------|----------|----------|
| F(12) | 2808 (9)  | 6079 (11) | 1118 (4) | 186 (9)  |
| F(13) | 994 (10)  | 1160 (8)  | 1060 (3) | 132 (5)  |
| F(14) | 2613 (14) | 1674 (12) | 993 (4)  | 210 (10) |
| F(15) | 2235 (10) | 1896 (7)  | 422 (4)  | 125 (5)  |
| F(16) | 655 (11)  | 1333 (10) | 495 (4)  | 162 (6)  |
| F(17) | 2091 (9)  | 729 (6)   | 629 (5)  | 147 (6)  |
| F(18) | 1070 (12) | 2331 (6)  | 821 (6)  | 191 (9)  |
| F(19) | 5329 (7)  | 4673 (6)  | 2002 (2) | 77 (3)   |
| F(20) | 5579 (7)  | 5281 (6)  | 2533 (3) | 82 (3)   |
| F(21) | 3830 (8)  | 5276 (6)  | 2610 (2) | 86 (3)   |
| F(22) | 3588 (6)  | 4657 (5)  | 2072 (2) | 64 (3)   |
| F(23) | 4500 (6)  | 5783 (5)  | 2109 (3) | 65 (3)   |
| F(24) | 4702 (6)  | 4136 (5)  | 2517 (3) | 70 (3)   |
| P(1)  | 9589 (3)  | 4835 (2)  | 2742 (1) | 40 (1)   |
| P(2)  | 2996 (3)  | 6490 (2)  | 762 (1)  | 39 (1)   |
| P(3)  | 1645 (3)  | 1541 (2)  | 752 (1)  | 42 (1)   |
| P(4)  | 4594 (3)  | 4957 (2)  | 2304 (1) | 36 (1)   |
| S(1)  | 1809 (3)  | 1764 (2)  | 4385 (1) | 36 (1)   |
| S(2)  | 4017 (3)  | 4224 (2)  | 3929 (1) | 35 (1)   |
| S(3)  | 8772 (3)  | 4207 (2)  | 1142 (1) | 37 (1)   |
| S(4)  | 6327 (3)  | 1723 (2)  | 677 (1)  | 43 (1)   |
| Fe(1) | 1169 (1)  | 2987 (1)  | 4207 (1) | 25 (1)   |
| Fe(2) | 3224 (1)  | 3231 (1)  | 3577 (1) | 26 (1)   |
| Fe(3) | 8036 (1)  | 3173 (1)  | 1453 (1) | 28 (1)   |
| Fe(4) | 5926 (1)  | 3007 (1)  | 823 (1)  | 26 (1)   |

---

**Table S-8.** Bond lengths [Å] and angles [deg] for  
 $[(\text{Fe}^{\text{III}}(\text{S}^{\text{Me}_2}\text{N}_4(\text{tren}))_2(\mu\text{-O}))(\text{PF}_6)_2 \cdot \text{MeCN}] (\mathbf{3})$

---

|                 |            |
|-----------------|------------|
| S (1) -Fe (1)   | 2.317 (4)  |
| S (2) -Fe (2)   | 2.330 (4)  |
| S (3) -Fe (3)   | 2.300 (4)  |
| S (4) -Fe (4)   | 2.307 (4)  |
| N (3) -Fe (1)   | 2.208 (10) |
| N (3) -H (1D)   | 0.9200     |
| N (3) -H (1E)   | 0.9200     |
| N (2) -Fe (1)   | 2.239 (10) |
| N (1) -Fe (1)   | 2.186 (10) |
| N (4) -Fe (1)   | 2.173 (10) |
| N (4) -H (4A)   | 0.9200     |
| N (4) -H (4B)   | 0.9200     |
| N (5) -Fe (2)   | 2.223 (10) |
| N (5) -H (5D)   | 0.9200     |
| N (5) -H (5E)   | 0.9200     |
| N (6) -Fe (2)   | 2.208 (10) |
| N (6) -H (6C)   | 0.9200     |
| N (6) -H (6D)   | 0.9200     |
| N (7) -Fe (2)   | 2.150 (10) |
| N (8) -Fe (2)   | 2.216 (10) |
| N (9) -Fe (3)   | 2.211 (11) |
| N (9) -H (9C)   | 0.9200     |
| N (9) -H (9D)   | 0.9200     |
| N (10) -Fe (3)  | 2.172 (10) |
| N (10) -H (10C) | 0.9200     |
| N (10) -H (10D) | 0.9200     |



Table S-8 (cont.).

|              |           |
|--------------|-----------|
| N(11)-Fe(3)  | 2.165(10) |
| N(12)-Fe(3)  | 2.237(9)  |
| N(13)-Fe(4)  | 2.238(9)  |
| N(13)-H(13D) | 0.9200    |
| N(13)-H(13E) | 0.9200    |
| N(14)-Fe(4)  | 2.221(9)  |
| N(15)-Fe(4)  | 2.157(9)  |
| N(16)-Fe(4)  | 2.168(10) |
| N(16)-H(16D) | 0.9200    |
| N(16)-H(16E) | 0.9200    |
| O(1)-Fe(1)   | 1.807(8)  |
| O(1)-Fe(2)   | 1.809(8)  |
| O(2)-Fe(4)   | 1.792(8)  |
| O(2)-Fe(3)   | 1.819(8)  |
| C(1)-C(3)    | 1.522(16) |
| C(1)-H(1A)   | 0.9800    |
| C(1)-H(1B)   | 0.9800    |
| C(1)-H(1C)   | 0.9800    |
| C(2)-C(3)    | 1.615(16) |
| C(2)-H(2A)   | 0.9800    |
| C(2)-H(2B)   | 0.9800    |
| C(2)-H(2C)   | 0.9800    |
| C(3)-C(4)    | 1.535(17) |
| C(3)-S(1)    | 1.831(11) |
| C(4)-N(3)    | 1.285(15) |
| C(4)-C(5)    | 1.517(16) |
| C(5)-H(5A)   | 0.9800    |
| C(5)-H(5B)   | 0.9800    |

Table S-8 (cont.).

|                 |            |
|-----------------|------------|
| C (5) -H (5C)   | 0.9800     |
| C (6) -N (3)    | 1.478 (15) |
| C (6) -C (7)    | 1.498 (17) |
| C (6) -H (6A)   | 0.9900     |
| C (6) -H (6B)   | 0.9900     |
| C (7) -N (2)    | 1.494 (16) |
| C (7) -H (7A)   | 0.9900     |
| C (7) -H (7B)   | 0.9900     |
| C (8) -C (9)    | 1.42 (2)   |
| C (8) -N (4)    | 1.437 (16) |
| C (8) -H (8A)   | 0.9900     |
| C (8) -H (8B)   | 0.9900     |
| C (9) -N (2)    | 1.461 (17) |
| C (9) -H (9A)   | 0.9900     |
| C (9) -H (9B)   | 0.9900     |
| C (10) -N (1)   | 1.477 (16) |
| C (10) -C (11)  | 1.55 (2)   |
| C (10) -H (10A) | 0.9900     |
| C (10) -H (10B) | 0.9900     |
| C (11) -N (2)   | 1.437 (15) |
| C (11) -H (11A) | 0.9900     |
| C (11) -H (11B) | 0.9900     |
| C (12) -C (14)  | 1.512 (16) |
| C (12) -H (12A) | 0.9800     |
| C (12) -H (12B) | 0.9800     |
| C (12) -H (12C) | 0.9800     |
| C (13) -C (14)  | 1.480 (18) |
| C (13) -H (13A) | 0.9800     |

Table S-8 (cont.).

|                 |            |
|-----------------|------------|
| C (13) -H (13B) | 0.9800     |
| C (13) -H (13C) | 0.9800     |
| C (14) -C (15)  | 1.585 (18) |
| C (14) -S (2)   | 1.890 (11) |
| C (15) -N (7)   | 1.244 (16) |
| C (15) -C (16)  | 1.495 (18) |
| C (16) -H (16A) | 0.9800     |
| C (16) -H (16B) | 0.9800     |
| C (16) -H (16C) | 0.9800     |
| C (17) -N (7)   | 1.463 (15) |
| C (17) -C (18)  | 1.568 (18) |
| C (17) -H (17A) | 0.9900     |
| C (9) -N (2)    | 1.461 (17) |
| C (9) -H (9A)   | 0.9900     |
| C (9) -H (9B)   | 0.9900     |
| C (10) -N (1)   | 1.477 (16) |
| C (10) -C (11)  | 1.55 (2)   |
| C (10) -H (10A) | 0.9900     |
| C (10) -H (10B) | 0.9900     |
| C (11) -N (2)   | 1.437 (15) |
| C (11) -H (11A) | 0.9900     |
| C (11) -H (11B) | 0.9900     |
| C (12) -C (14)  | 1.512 (16) |
| C (12) -H (12A) | 0.9800     |
| C (12) -H (12B) | 0.9800     |
| C (12) -H (12C) | 0.9800     |
| C (13) -C (14)  | 1.480 (18) |
| C (13) -H (13A) | 0.9800     |

Table S-8 (cont.).

|                 |            |
|-----------------|------------|
| C (13) -H (13B) | 0.9800     |
| C (13) -H (13C) | 0.9800     |
| C (14) -C (15)  | 1.585 (18) |
| C (14) -S (2)   | 1.890 (11) |
| C (15) -N (7)   | 1.244 (16) |
| C (15) -C (16)  | 1.495 (18) |
| C (16) -H (16A) | 0.9800     |
| C (16) -H (16B) | 0.9800     |
| C (16) -H (16C) | 0.9800     |
| C (17) -N (7)   | 1.463 (15) |
| C (17) -C (18)  | 1.568 (18) |
| C (17) -H (17A) | 0.9900     |
| C (17) -H (17B) | 0.9900     |
| C (18) -N (8)   | 1.475 (15) |
| C (18) -H (18A) | 0.9900     |
| C (18) -H (18B) | 0.9900     |
| C (19) -N (8)   | 1.476 (16) |
| C (19) -C (20)  | 1.553 (17) |
| C (19) -H (19A) | 0.9900     |
| C (19) -H (19B) | 0.9900     |
| C (20) -N (6)   | 1.460 (15) |
| C (20) -H (20A) | 0.9900     |
| C (20) -H (20B) | 0.9900     |
| C (21) -N (5)   | 1.514 (16) |
| C (21) -C (22)  | 1.55 (2)   |
| C (21) -H (21A) | 0.9900     |
| C (21) -H (21B) | 0.9900     |
| C (22) -N (8)   | 1.528 (16) |

Table S-8 (cont.).

|                 |            |
|-----------------|------------|
| C (22) -H (22A) | 0.9900     |
| C (22) -H (22B) | 0.9900     |
| C (23) -C (25)  | 1.502 (16) |
| C (23) -H (23A) | 0.9800     |
| C (23) -H (23B) | 0.9800     |
| C (23) -H (23C) | 0.9800     |
| C (24) -C (25)  | 1.549 (16) |
| C (24) -H (24A) | 0.9800     |
| C (24) -H (24B) | 0.9800     |
| C (24) -H (24C) | 0.9800     |
| C (25) -C (26)  | 1.529 (18) |
| C (25) -S (3)   | 1.832 (13) |
| C (26) -N (11)  | 1.302 (16) |
| C (26) -C (27)  | 1.504 (18) |
| C (27) -H (27A) | 0.9800     |
| C (27) -H (27B) | 0.9800     |
| C (27) -H (27C) | 0.9800     |
| C (28) -N (11)  | 1.507 (15) |
| C (28) -C (29)  | 1.526 (18) |
| C (28) -H (28A) | 0.9900     |
| C (28) -H (28B) | 0.9900     |
| C (29) -N (12)  | 1.443 (16) |
| C (29) -H (29A) | 0.9900     |
| C (29) -H (29B) | 0.9900     |
| C (30) -N (10)  | 1.455 (16) |
| C (30) -C (31)  | 1.553 (19) |
| C (30) -H (30A) | 0.9900     |
| C (30) -H (30B) | 0.9900     |

Table S-8 (cont.).

|                 |            |
|-----------------|------------|
| C (31) -N (12)  | 1.466 (17) |
| C (31) -H (31A) | 0.9900     |
| C (31) -H (31B) | 0.9900     |
| C (32) -N (9)   | 1.487 (15) |
| C (32) -C (33)  | 1.544 (19) |
| C (32) -H (32A) | 0.9900     |
| C (32) -H (32B) | 0.9900     |
| C (33) -N (12)  | 1.491 (15) |
| C (33) -H (33A) | 0.9900     |
| C (33) -H (33B) | 0.9900     |
| C (34) -C (36)  | 1.554 (17) |
| C (34) -H (34A) | 0.9800     |
| C (34) -H (34B) | 0.9800     |
| C (34) -H (34C) | 0.9800     |
| C (35) -C (36)  | 1.550 (15) |
| C (35) -H (35A) | 0.9800     |
| C (35) -H (35B) | 0.9800     |
| C (35) -H (35C) | 0.9800     |
| C (36) -C (37)  | 1.514 (17) |
| C (36) -S (4)   | 1.818 (12) |
| C (37) -N (15)  | 1.276 (14) |
| C (37) -C (38)  | 1.516 (17) |
| C (38) -H (38A) | 0.9800     |
| C (38) -H (38B) | 0.9800     |
| C (38) -H (38C) | 0.9800     |
| C (39) -N (15)  | 1.460 (14) |
| C (39) -C (40)  | 1.509 (15) |
| C (39) -H (39A) | 0.9900     |

Table S-8 (cont.).

|                 |            |
|-----------------|------------|
| C (39) -H (39B) | 0.9900     |
| C (40) -N (14)  | 1.498 (14) |
| C (40) -H (40A) | 0.9900     |
| C (40) -H (40B) | 0.9900     |
| C (41) -C (42)  | 1.466 (16) |
| C (41) -N (13)  | 1.471 (14) |
| C (41) -H (41A) | 0.9900     |
| C (41) -H (41B) | 0.9900     |
| C (42) -N (14)  | 1.479 (14) |
| C (42) -H (42A) | 0.9900     |
| C (42) -H (42B) | 0.9900     |
| C (43) -C (44)  | 1.487 (18) |
| C (43) -N (16)  | 1.498 (17) |
| C (43) -H (43A) | 0.9900     |
| C (43) -H (43B) | 0.9900     |
| C (44) -N (14)  | 1.507 (15) |
| C (44) -H (44A) | 0.9900     |
| C (44) -H (44B) | 0.9900     |
| C (45) -C (46)  | 1.422 (19) |
| C (45) -H (45A) | 0.9800     |
| C (45) -H (45B) | 0.9800     |
| C (45) -H (45C) | 0.9800     |
| C (46) -N (17)  | 1.161 (16) |
| C (47) -C (48)  | 1.43 (2)   |
| C (47) -H (47A) | 0.9800     |
| C (47) -H (47B) | 0.9800     |
| C (47) -H (47C) | 0.9800     |
| C (48) -N (18)  | 1.133 (19) |

Table S-8 (cont.).

|                       |            |
|-----------------------|------------|
| F (1) -P (1)          | 1.550 (10) |
| F (2) -P (1)          | 1.566 (10) |
| F (3) -P (1)          | 1.511 (11) |
| F (4) -P (1)          | 1.555 (9)  |
| F (5) -P (1)          | 1.542 (9)  |
| F (6) -P (1)          | 1.559 (10) |
| F (7) -P (2)          | 1.524 (11) |
| F (8) -P (2)          | 1.586 (9)  |
| F (9) -P (2)          | 1.522 (10) |
| F (10) -P (2)         | 1.577 (9)  |
| F (11) -P (2)         | 1.559 (12) |
| F (12) -P (2)         | 1.497 (12) |
| F (13) -P (3)         | 1.550 (10) |
| F (14) -P (3)         | 1.506 (12) |
| F (15) -P (3)         | 1.550 (10) |
| F (16) -P (3)         | 1.583 (13) |
| F (17) -P (3)         | 1.560 (11) |
| F (18) -P (3)         | 1.552 (10) |
| F (19) -P (4)         | 1.534 (8)  |
| F (20) -P (4)         | 1.579 (9)  |
| F (21) -P (4)         | 1.587 (9)  |
| F (22) -P (4)         | 1.594 (9)  |
| F (23) -P (4)         | 1.576 (8)  |
| F (24) -P (4)         | 1.602 (8)  |
| C (3) -S (1) -Fe (1)  | 104.4 (4)  |
| C (14) -S (2) -Fe (2) | 103.6 (4)  |
| C (25) -S (3) -Fe (3) | 103.9 (4)  |
| C (36) -S (4) -Fe (4) | 104.0 (4)  |



**Table S-8 (cont.)**

|                      |           |
|----------------------|-----------|
| O (1) -Fe (1) -N (4) | 91.4 (4)  |
| O (1) -Fe (1) -N (1) | 178.6 (4) |
| N (4) -Fe (1) -N (1) | 87.2 (4)  |
| O (1) -Fe (1) -N (3) | 92.3 (4)  |
| N (4) -Fe (1) -N (3) | 153.2 (4) |
| N (3) -Fe (1) -N (1) | 89.1 (4)  |
| O (1) -Fe (1) -N (2) | 102.9 (4) |
| N (4) -Fe (1) -N (2) | 77.8 (4)  |
| N (1) -Fe (1) -N (2) | 77.2 (4)  |
| N (3) -Fe (1) -N (2) | 75.4 (4)  |
| O (1) -Fe (1) -S (1) | 99.6 (3)  |
| N (4) -Fe (1) -S (1) | 105.3 (3) |
| N (1) -Fe (1) -S (1) | 80.4 (3)  |
| N (3) -Fe (1) -S (1) | 100.2 (3) |
| N (2) -Fe (1) -S (1) | 157.2 (3) |
| O (1) -Fe (2) -N (7) | 175.4 (4) |
| O (1) -Fe (2) -N (6) | 94.4 (4)  |
| N (7) -Fe (2) -N (6) | 90.1 (4)  |
| O (1) -Fe (2) -N (8) | 103.2 (4) |
| N (7) -Fe (2) -N (8) | 77.7 (4)  |
| N (6) -Fe (2) -N (8) | 77.5 (4)  |
| O (1) -Fe (2) -N (5) | 91.7 (4)  |
| N (7) -Fe (2) -N (5) | 84.1 (4)  |
| N (6) -Fe (2) -N (5) | 154.3 (4) |
| N (8) -Fe (2) -N (5) | 76.8 (4)  |
| O (1) -Fe (2) -S (2) | 98.4 (3)  |
| N (7) -Fe (2) -S (2) | 81.1 (3)  |
| N (6) -Fe (2) -S (2) | 97.6 (3)  |

Table S-8 (cont.) .

|                        |           |
|------------------------|-----------|
| N (8) -Fe (2) -S (2)   | 158.2 (3) |
| N (5) -Fe (2) -S (2)   | 106.1 (3) |
| O (2) -Fe (3) -N (11)  | 175.8 (4) |
| O (2) -Fe (3) -N (10)  | 93.5 (4)  |
| N (11) -Fe (3) -N (10) | 90.0 (4)  |
| O (2) -Fe (3) -N (9)   | 92.0 (4)  |
| N (11) -Fe (3) -N (9)  | 83.8 (4)  |
| N (10) -Fe (3) -N (9)  | 154.5 (4) |
| O (2) -Fe (3) -N (12)  | 99.8 (4)  |
| N (11) -Fe (3) -N (12) | 78.8 (4)  |
| N (10) -Fe (3) -N (12) | 77.0 (4)  |
| N (9) -Fe (3) -N (12)  | 77.5 (4)  |
| O (2) -Fe (3) -S (3)   | 100.6 (3) |
| N (11) -Fe (3) -S (3)  | 81.1 (3)  |
| N (10) -Fe (3) -S (3)  | 98.4 (3)  |
| N (9) -Fe (3) -S (3)   | 104.9 (3) |
| N (12) -Fe (3) -S (3)  | 159.4 (3) |
| O (2) -Fe (4) -N (15)  | 175.4 (4) |
| O (2) -Fe (4) -N (16)  | 91.3 (4)  |
| N (15) -Fe (4) -N (16) | 93.1 (4)  |
| O (2) -Fe (4) -N (14)  | 101.2 (3) |
| N (15) -Fe (4) -N (14) | 78.5 (4)  |
| N (16) -Fe (4) -N (14) | 78.5 (4)  |
| O (2) -Fe (4) -N (13)  | 93.0 (4)  |
| N (15) -Fe (4) -N (13) | 82.4 (4)  |
| N (16) -Fe (4) -N (13) | 155.2 (4) |
| N (14) -Fe (4) -N (13) | 76.7 (4)  |
| O (2) -Fe (4) -S (4)   | 100.2 (3) |

Table S-8 (cont.) .

|                  |           |
|------------------|-----------|
| N(15)-Fe(4)-S(4) | 80.4(3)   |
| N(16)-Fe(4)-S(4) | 98.3(3)   |
| N(14)-Fe(4)-S(4) | 158.4(3)  |
| N(13)-Fe(4)-S(4) | 105.0(3)  |
| C(10)-N(3)-Fe(1) | 116.0(9)  |
| C(10)-N(3)-H(1D) | 108.3     |
| Fe(1)-N(3)-H(1D) | 108.3     |
| C(10)-N(3)-H(1E) | 108.3     |
| Fe(1)-N(3)-H(1E) | 108.3     |
| H(1D)-N(3)-H(1E) | 107.4     |
| C(11)-N(2)-C(9)  | 110.3(12) |
| C(11)-N(2)-C(7)  | 111.4(10) |
| C(9)-N(2)-C(7)   | 114.0(12) |
| C(11)-N(2)-Fe(1) | 103.9(8)  |
| C(9)-N(2)-Fe(1)  | 104.9(8)  |
| C(7)-N(2)-Fe(1)  | 111.8(8)  |
| C(4)-N(1)-C(6)   | 119.1(10) |
| C(4)-N(1)-Fe(1)  | 123.2(8)  |
| C(6)-N(1)-Fe(1)  | 116.6(7)  |
| C(8)-N(4)-Fe(1)  | 114.0(9)  |
| C(8)-N(4)-H(4A)  | 108.8     |
| Fe(1)-N(4)-H(4A) | 108.8     |
| C(8)-N(4)-H(4B)  | 108.8     |
| Fe(1)-N(4)-H(4B) | 108.8     |
| H(4A)-N(4)-H(4B) | 107.7     |
| C(21)-N(5)-Fe(2) | 113.4(7)  |
| C(21)-N(5)-H(5D) | 108.9     |
| Fe(2)-N(5)-H(5D) | 108.9     |

Table S-8 (cont.)

|                         |            |
|-------------------------|------------|
| C (21) -N (5) -H (5E)   | 108.9      |
| Fe (2) -N (5) -H (5E)   | 108.9      |
| H (5D) -N (5) -H (5E)   | 107.7      |
| C (20) -N (6) -Fe (2)   | 114.0 (7)  |
| C (20) -N (6) -H (6C)   | 108.7      |
| Fe (2) -N (6) -H (6C)   | 108.7      |
| C (20) -N (6) -H (6D)   | 108.7      |
| Fe (2) -N (6) -H (6D)   | 108.7      |
| H (6C) -N (6) -H (6D)   | 107.6      |
| C (15) -N (7) -C (17)   | 120.1 (11) |
| C (15) -N (7) -Fe (2)   | 124.3 (9)  |
| C (17) -N (7) -Fe (2)   | 115.3 (8)  |
| C (18) -N (8) -C (19)   | 107.1 (10) |
| C (18) -N (8) -C (22)   | 113.1 (10) |
| C (19) -N (8) -C (22)   | 108.1 (10) |
| C (18) -N (8) -Fe (2)   | 114.9 (8)  |
| C (19) -N (8) -Fe (2)   | 106.2 (7)  |
| C (22) -N (8) -Fe (2)   | 107.0 (8)  |
| C (32) -N (9) -Fe (3)   | 113.7 (8)  |
| C (32) -N (9) -H (9C)   | 108.8      |
| Fe (3) -N (9) -H (9C)   | 108.8      |
| C (32) -N (9) -H (9D)   | 108.8      |
| Fe (3) -N (9) -H (9D)   | 108.8      |
| H (9C) -N (9) -H (9D)   | 107.7      |
| C (30) -N (10) -Fe (3)  | 114.4 (8)  |
| C (30) -N (10) -H (10C) | 108.6      |
| Fe (3) -N (10) -H (10C) | 108.6      |
| C (30) -N (10) -H (10D) | 108.6      |

Table S-8 (cont.)

|                          |            |
|--------------------------|------------|
| Fe (3) -N (10) -H (10D)  | 108.6      |
| H (10C) -N (10) -H (10D) | 107.6      |
| C (26) -N (11) -C (28)   | 121.9 (12) |
| C (26) -N (11) -Fe (3)   | 123.7 (9)  |
| C (28) -N (11) -Fe (3)   | 114.3 (8)  |
| C (29) -N (12) -C (31)   | 112.1 (10) |
| C (29) -N (12) -C (33)   | 115.0 (10) |
| C (31) -N (12) -C (33)   | 108.3 (11) |
| C (29) -N (12) -Fe (3)   | 111.4 (7)  |
| C (31) -N (12) -Fe (3)   | 104.3 (7)  |
| C (33) -N (12) -Fe (3)   | 105.0 (7)  |
| C (41) -N (13) -Fe (4)   | 111.9 (8)  |
| C (41) -N (13) -H (13D)  | 109.2      |
| Fe (4) -N (13) -H (13D)  | 109.2      |
| C (41) -N (13) -H (13E)  | 109.2      |
| Fe (4) -N (13) -H (13E)  | 109.2      |
| H (13D) -N (13) -H (13E) | 107.9      |
| C (42) -N (14) -C (40)   | 112.0 (10) |
| C (42) -N (14) -C (44)   | 109.7 (9)  |
| C (40) -N (14) -C (44)   | 112.4 (9)  |
| C (42) -N (14) -Fe (4)   | 105.0 (7)  |
| C (40) -N (14) -Fe (4)   | 112.8 (6)  |
| C (44) -N (14) -Fe (4)   | 104.5 (6)  |
| C (37) -N (15) -C (39)   | 120.6 (10) |
| C (37) -N (15) -Fe (4)   | 123.9 (8)  |
| C (39) -N (15) -Fe (4)   | 115.1 (7)  |
| C (43) -N (16) -Fe (4)   | 112.4 (8)  |
| C (43) -N (16) -H (16D)  | 109.1      |

Table S-8 (cont.).

|                          |            |
|--------------------------|------------|
| Fe (4) -N (16) -H (16D)  | 109.1      |
| C (43) -N (16) -H (16E)  | 109.1      |
| Fe (4) -N (16) -H (16E)  | 109.1      |
| H (16D) -N (16) -H (16E) | 107.9      |
| Fe (1) -O (1) -Fe (2)    | 155.3 (5)  |
| Fe (4) -O (2) -Fe (3)    | 149.8 (5)  |
| C (3) -C (1) -H (1A)     | 109.5      |
| C (3) -C (1) -H (1B)     | 109.5      |
| H (1A) -C (1) -H (1B)    | 109.5      |
| C (3) -C (1) -H (1C)     | 109.5      |
| H (1A) -C (1) -H (1C)    | 109.5      |
| H (1B) -C (1) -H (1C)    | 109.5      |
| C (3) -C (2) -H (2A)     | 109.5      |
| C (3) -C (2) -H (2B)     | 109.5      |
| H (2A) -C (2) -H (2B)    | 109.5      |
| C (3) -C (2) -H (2C)     | 109.5      |
| H (2A) -C (2) -H (2C)    | 109.5      |
| H (2B) -C (2) -H (2C)    | 109.5      |
| C (1) -C (3) -C (4)      | 111.1 (10) |
| C (1) -C (3) -C (2)      | 111.0 (10) |
| C (4) -C (3) -C (2)      | 106.3 (10) |
| C (1) -C (3) -S (1)      | 110.2 (9)  |
| C (4) -C (3) -S (1)      | 111.5 (8)  |
| C (2) -C (3) -S (1)      | 106.6 (8)  |
| N (3) -C (4) -C (5)      | 122.0 (12) |
| N (3) -C (4) -C (3)      | 119.9 (10) |
| C (5) -C (4) -C (3)      | 118.1 (11) |
| C (4) -C (5) -H (5A)     | 109.5      |

Table S-8 (cont.).

|                       |            |
|-----------------------|------------|
| C (4) -C (5) -H (5B)  | 109.5      |
| H (5A) -C (5) -H (5B) | 109.5      |
| C (4) -C (5) -H (5C)  | 109.5      |
| H (5A) -C (5) -H (5C) | 109.5      |
| H (5B) -C (5) -H (5C) | 109.5      |
| N (3) -C (6) -C (7)   | 110.3 (10) |
| N (3) -C (6) -H (6A)  | 109.6      |
| C (7) -C (6) -H (6A)  | 109.6      |
| N (3) -C (6) -H (6B)  | 109.6      |
| C (7) -C (6) -H (6B)  | 109.6      |
| H (6A) -C (6) -H (6B) | 108.1      |
| N (2) -C (7) -C (6)   | 114.6 (10) |
| N (2) -C (7) -H (7A)  | 108.6      |
| C (6) -C (7) -H (7A)  | 108.6      |
| N (2) -C (7) -H (7B)  | 108.6      |
| C (6) -C (7) -H (7B)  | 108.6      |
| H (7A) -C (7) -H (7B) | 107.6      |
| C (9) -C (8) -N (4)   | 112.9 (13) |
| C (9) -C (8) -H (8A)  | 109.0      |
| N (4) -C (8) -H (8A)  | 109.0      |
| C (9) -C (8) -H (8B)  | 109.0      |
| N (4) -C (8) -H (8B)  | 109.0      |
| H (8A) -C (8) -H (8B) | 107.8      |
| C (8) -C (9) -N (2)   | 116.8 (14) |
| C (8) -C (9) -H (9A)  | 108.1      |
| N (2) -C (9) -H (9A)  | 108.1      |
| C (8) -C (9) -H (9B)  | 108.1      |
| N (2) -C (9) -H (9B)  | 108.1      |

Table S-8 (cont.) .

|                          |            |
|--------------------------|------------|
| H (9A) -C (9) -H (9B)    | 107.3      |
| N (1) -C (10) -C (11)    | 106.8 (11) |
| N (1) -C (10) -H (10A)   | 110.4      |
| C (11) -C (10) -H (10A)  | 110.4      |
| N (1) -C (10) -H (10B)   | 110.4      |
| C (11) -C (10) -H (10B)  | 110.4      |
| H (10A) -C (10) -H (10B) | 108.6      |
| N (2) -C (11) -C (10)    | 113.6 (12) |
| N (2) -C (11) -H (11A)   | 108.8      |
| C (10) -C (11) -H (11A)  | 108.8      |
| N (2) -C (11) -H (11B)   | 108.8      |
| C (10) -C (11) -H (11B)  | 108.8      |
| H (11A) -C (11) -H (11B) | 107.7      |
| C (14) -C (12) -H (12A)  | 109.5      |
| C (14) -C (12) -H (12B)  | 109.5      |
| H (12A) -C (12) -H (12B) | 109.5      |
| C (14) -C (12) -H (12C)  | 109.5      |
| H (12A) -C (12) -H (12C) | 109.5      |
| H (12B) -C (12) -H (12C) | 109.5      |
| C (14) -C (13) -H (13A)  | 109.5      |
| C (14) -C (13) -H (13B)  | 109.5      |
| H (13A) -C (13) -H (13B) | 109.5      |
| C (14) -C (13) -H (13C)  | 109.5      |
| H (13A) -C (13) -H (13C) | 109.5      |
| H (13B) -C (13) -H (13C) | 109.5      |
| C (13) -C (14) -C (12)   | 113.8 (12) |
| C (13) -C (14) -C (15)   | 114.8 (10) |
| C (12) -C (14) -C (15)   | 106.9 (10) |



Table S-8 (cont.) .

|                          |            |
|--------------------------|------------|
| C (13) -C (14) -S (2)    | 110.0 (8)  |
| C (12) -C (14) -S (2)    | 103.6 (8)  |
| C (15) -C (14) -S (2)    | 107.0 (9)  |
| N (7) -C (15) -C (16)    | 124.4 (12) |
| N (7) -C (15) -C (14)    | 122.1 (11) |
| C (16) -C (15) -C (14)   | 113.1 (12) |
| C (15) -C (16) -H (16A)  | 109.5      |
| C (15) -C (16) -H (16B)  | 109.5      |
| H (16A) -C (16) -H (16B) | 109.5      |
| C (15) -C (16) -H (16C)  | 109.5      |
| H (16A) -C (16) -H (16C) | 109.5      |
| H (16B) -C (16) -H (16C) | 109.5      |
| N (7) -C (17) -C (18)    | 111.3 (10) |
| N (7) -C (17) -H (17A)   | 109.4      |
| C (18) -C (17) -H (17A)  | 109.4      |
| N (7) -C (17) -H (17B)   | 109.4      |
| C (18) -C (17) -H (17B)  | 109.4      |
| H (17A) -C (17) -H (17B) | 108.0      |
| N (8) -C (18) -C (17)    | 110.4 (10) |
| N (8) -C (18) -H (18A)   | 109.6      |
| C (17) -C (18) -H (18A)  | 109.6      |
| N (8) -C (18) -H (18B)   | 109.6      |
| C (17) -C (18) -H (18B)  | 109.6      |
| H (18A) -C (18) -H (18B) | 108.1      |
| N (8) -C (19) -C (20)    | 109.1 (10) |
| N (8) -C (19) -H (19A)   | 109.9      |
| C (20) -C (19) -H (19A)  | 109.9      |
| N (8) -C (19) -H (19B)   | 109.9      |

Table S-8 (cont.)

|                          |            |
|--------------------------|------------|
| C (20) -C (19) -H (19B)  | 109.9      |
| H (19A) -C (19) -H (19B) | 108.3      |
| N (6) -C (20) -C (19)    | 108.3 (9)  |
| N (6) -C (20) -H (20A)   | 110.0      |
| C (19) -C (20) -H (20A)  | 110.0      |
| N (6) -C (20) -H (20B)   | 110.0      |
| C (19) -C (20) -H (20B)  | 110.0      |
| H (20A) -C (20) -H (20B) | 108.4      |
| N (5) -C (21) -C (22)    | 110.2 (10) |
| N (5) -C (21) -H (21A)   | 109.6      |
| C (22) -C (21) -H (21A)  | 109.6      |
| N (5) -C (21) -H (21B)   | 109.6      |
| C (22) -C (21) -H (21B)  | 109.6      |
| H (21A) -C (21) -H (21B) | 108.1      |
| N (8) -C (22) -C (21)    | 106.2 (12) |
| N (8) -C (22) -H (22A)   | 110.5      |
| C (21) -C (22) -H (22A)  | 110.5      |
| N (8) -C (22) -H (22B)   | 110.5      |
| C (21) -C (22) -H (22B)  | 110.5      |
| H (22A) -C (22) -H (22B) | 108.7      |
| C (25) -C (23) -H (23A)  | 109.5      |
| C (25) -C (23) -H (23B)  | 109.5      |
| H (23A) -C (23) -H (23B) | 109.5      |
| C (25) -C (23) -H (23C)  | 109.5      |
| H (23A) -C (23) -H (23C) | 109.5      |
| H (23B) -C (23) -H (23C) | 109.5      |
| C (25) -C (24) -H (24A)  | 109.5      |
| C (25) -C (24) -H (24B)  | 109.5      |

Table S-8 (cont.) .

|                          |            |
|--------------------------|------------|
| H (24A) -C (24) -H (24B) | 109.5      |
| C (25) -C (24) -H (24C)  | 109.5      |
| H (24A) -C (24) -H (24C) | 109.5      |
| H (24B) -C (24) -H (24C) | 109.5      |
| C (23) -C (25) -C (26)   | 109.1 (10) |
| C (23) -C (25) -C (24)   | 111.8 (10) |
| C (26) -C (25) -C (24)   | 108.2 (11) |
| C (23) -C (25) -S (3)    | 108.6 (9)  |
| C (26) -C (25) -S (3)    | 112.5 (9)  |
| C (24) -C (25) -S (3)    | 106.6 (9)  |
| N (11) -C (26) -C (27)   | 120.8 (13) |
| N (11) -C (26) -C (25)   | 118.5 (12) |
| C (27) -C (26) -C (25)   | 120.3 (12) |
| C (26) -C (27) -H (27A)  | 109.5      |
| C (26) -C (27) -H (27B)  | 109.5      |
| H (27A) -C (27) -H (27B) | 109.5      |
| C (26) -C (27) -H (27C)  | 109.5      |
| H (27A) -C (27) -H (27C) | 109.5      |
| H (27B) -C (27) -H (27C) | 109.5      |
| N (11) -C (28) -C (29)   | 109.5 (10) |
| N (11) -C (28) -H (28A)  | 109.8      |
| C (29) -C (28) -H (28A)  | 109.8      |
| N (11) -C (28) -H (28B)  | 109.8      |
| C (29) -C (28) -H (28B)  | 109.8      |
| H (28A) -C (28) -H (28B) | 108.2      |
| N (12) -C (29) -C (28)   | 115.9 (11) |
| N (12) -C (29) -H (29A)  | 108.3      |
| C (28) -C (29) -H (29A)  | 108.3      |

Table S-8 (cont.) .

|                          |            |
|--------------------------|------------|
| N (12) -C (29) -H (29B)  | 108.3      |
| C (28) -C (29) -H (29B)  | 108.3      |
| H (29A) -C (29) -H (29B) | 107.4      |
| N (10) -C (30) -C (31)   | 109.7 (10) |
| N (10) -C (30) -H (30A)  | 109.7      |
| C (31) -C (30) -H (30A)  | 109.7      |
| N (10) -C (30) -H (30B)  | 109.7      |
| C (31) -C (30) -H (30B)  | 109.7      |
| H (30A) -C (30) -H (30B) | 108.2      |
| N (12) -C (31) -C (30)   | 108.3 (10) |
| N (12) -C (31) -H (31A)  | 110.0      |
| C (30) -C (31) -H (31A)  | 110.0      |
| N (12) -C (31) -H (31B)  | 110.0      |
| C (30) -C (31) -H (31B)  | 110.0      |
| H (31A) -C (31) -H (31B) | 108.4      |
| N (9) -C (32) -C (33)    | 108.7 (10) |
| N (9) -C (32) -H (32A)   | 109.9      |
| C (33) -C (32) -H (32A)  | 109.9      |
| N (9) -C (32) -H (32B)   | 109.9      |
| C (33) -C (32) -H (32B)  | 109.9      |
| H (32A) -C (32) -H (32B) | 108.3      |
| N (12) -C (33) -C (32)   | 109.0 (11) |
| N (12) -C (33) -H (33A)  | 109.9      |
| C (32) -C (33) -H (33A)  | 109.9      |
| N (12) -C (33) -H (33B)  | 109.9      |
| C (32) -C (33) -H (33B)  | 109.9      |
| H (33A) -C (33) -H (33B) | 108.3      |
| C (36) -C (34) -H (34A)  | 109.5      |

Table S-8 (cont.) .

|                          |            |
|--------------------------|------------|
| C (36) -C (34) -H (34B)  | 109.5      |
| H (34A) -C (34) -H (34B) | 109.5      |
| C (36) -C (34) -H (34C)  | 109.5      |
| H (34A) -C (34) -H (34C) | 109.5      |
| H (34B) -C (34) -H (34C) | 109.5      |
| C (36) -C (35) -H (35A)  | 109.5      |
| C (36) -C (35) -H (35B)  | 109.5      |
| H (35A) -C (35) -H (35B) | 109.5      |
| C (36) -C (35) -H (35C)  | 109.5      |
| H (35A) -C (35) -H (35C) | 109.5      |
| H (35B) -C (35) -H (35C) | 109.5      |
| C (37) -C (36) -C (35)   | 110.7 (10) |
| C (37) -C (36) -C (34)   | 108.3 (10) |
| C (35) -C (36) -C (34)   | 110.5 (11) |
| C (37) -C (36) -S (4)    | 111.9 (8)  |
| C (35) -C (36) -S (4)    | 107.1 (8)  |
| C (34) -C (36) -S (4)    | 108.3 (9)  |
| N (15) -C (37) -C (36)   | 119.7 (10) |
| N (15) -C (37) -C (38)   | 122.7 (11) |
| C (36) -C (37) -C (38)   | 117.4 (10) |
| C (37) -C (38) -H (38A)  | 109.5      |
| C (37) -C (38) -H (38B)  | 109.5      |
| H (38A) -C (38) -H (38B) | 109.5      |
| C (37) -C (38) -H (38C)  | 109.5      |
| H (38A) -C (38) -H (38C) | 109.5      |
| H (38B) -C (38) -H (38C) | 109.5      |
| N (15) -C (39) -C (40)   | 113.7 (10) |
| N (15) -C (39) -H (39A)  | 108.8      |

Table S-8 (cont.) .

|                          |            |
|--------------------------|------------|
| C (40) -C (39) -H (39A)  | 108.8      |
| N (15) -C (39) -H (39B)  | 108.8      |
| C (40) -C (39) -H (39B)  | 108.8      |
| H (39A) -C (39) -H (39B) | 107.7      |
| N (14) -C (40) -C (39)   | 112.7 (9)  |
| N (14) -C (40) -H (40A)  | 109.0      |
| C (39) -C (40) -H (40A)  | 109.0      |
| N (14) -C (40) -H (40B)  | 109.0      |
| C (39) -C (40) -H (40B)  | 109.0      |
| H (40A) -C (40) -H (40B) | 107.8      |
| C (42) -C (41) -N (13)   | 110.6 (10) |
| C (42) -C (41) -H (41A)  | 109.5      |
| N (13) -C (41) -H (41A)  | 109.5      |
| C (42) -C (41) -H (41B)  | 109.5      |
| N (13) -C (41) -H (41B)  | 109.5      |
| H (41A) -C (41) -H (41B) | 108.1      |
| C (41) -C (42) -N (14)   | 110.4 (10) |
| C (41) -C (42) -H (42A)  | 109.6      |
| N (14) -C (42) -H (42A)  | 109.6      |
| C (41) -C (42) -H (42B)  | 109.6      |
| N (14) -C (42) -H (42B)  | 109.6      |
| H (42A) -C (42) -H (42B) | 108.1      |
| C (44) -C (43) -N (16)   | 112.0 (11) |
| C (44) -C (43) -H (43A)  | 109.2      |
| N (16) -C (43) -H (43A)  | 109.2      |
| C (44) -C (43) -H (43B)  | 109.2      |
| N (16) -C (43) -H (43B)  | 109.2      |
| H (43A) -C (43) -H (43B) | 107.9      |

Table S-8 (cont.) .

|                          |            |
|--------------------------|------------|
| C (43) -C (44) -N (14)   | 109.9 (10) |
| C (43) -C (44) -H (44A)  | 109.7      |
| N (14) -C (44) -H (44A)  | 109.7      |
| C (43) -C (44) -H (44B)  | 109.7      |
| N (14) -C (44) -H (44B)  | 109.7      |
| H (44A) -C (44) -H (44B) | 108.2      |
| C (46) -C (45) -H (45A)  | 109.5      |
| C (46) -C (45) -H (45B)  | 109.5      |
| H (45A) -C (45) -H (45B) | 109.5      |
| C (46) -C (45) -H (45C)  | 109.5      |
| H (45A) -C (45) -H (45C) | 109.5      |
| H (45B) -C (45) -H (45C) | 109.5      |
| N (17) -C (46) -C (45)   | 174.8 (15) |
| C (48) -C (47) -H (47A)  | 109.5      |
| C (48) -C (47) -H (47B)  | 109.5      |
| H (47A) -C (47) -H (47B) | 109.5      |
| C (48) -C (47) -H (47C)  | 109.5      |
| H (47A) -C (47) -H (47C) | 109.5      |
| H (47B) -C (47) -H (47C) | 109.5      |
| N (18) -C (48) -C (47)   | 175.9 (19) |
| F (3) -P (1) -F (5)      | 92.4 (8)   |
| F (3) -P (1) -F (1)      | 177.3 (9)  |
| F (5) -P (1) -F (1)      | 90.0 (8)   |
| F (3) -P (1) -F (4)      | 92.7 (7)   |
| F (5) -P (1) -F (4)      | 87.4 (6)   |
| F (1) -P (1) -F (4)      | 86.1 (7)   |
| F (3) -P (1) -F (6)      | 91.9 (7)   |
| F (5) -P (1) -F (6)      | 175.2 (8)  |

Table S-8 (cont.).

|                       |           |
|-----------------------|-----------|
| F (1) -P (1) -F (6)   | 85.8 (7)  |
| F (4) -P (1) -F (6)   | 94.5 (6)  |
| F (3) -P (1) -F (2)   | 88.6 (7)  |
| F (5) -P (1) -F (2)   | 91.6 (6)  |
| F (1) -P (1) -F (2)   | 92.6 (7)  |
| F (4) -P (1) -F (2)   | 178.4 (6) |
| F (6) -P (1) -F (2)   | 86.4 (6)  |
| F (12) -P (2) -F (9)  | 99.2 (10) |
| F (12) -P (2) -F (7)  | 88.3 (9)  |
| F (9) -P (2) -F (7)   | 172.3 (9) |
| F (12) -P (2) -F (11) | 173.5 (8) |
| F (9) -P (2) -F (11)  | 87.0 (8)  |
| F (7) -P (2) -F (11)  | 85.6 (8)  |
| F (12) -P (2) -F (10) | 89.9 (7)  |
| F (9) -P (2) -F (10)  | 94.4 (6)  |
| F (7) -P (2) -F (10)  | 87.5 (6)  |
| F (11) -P (2) -F (10) | 87.8 (6)  |
| F (12) -P (2) -F (8)  | 91.4 (7)  |
| F (9) -P (2) -F (8)   | 85.8 (6)  |
| F (7) -P (2) -F (8)   | 92.1 (6)  |
| F (11) -P (2) -F (8)  | 90.9 (7)  |
| F (10) -P (2) -F (8)  | 178.6 (7) |
| F (14) -P (3) -F (15) | 89.7 (8)  |
| F (14) -P (3) -F (13) | 94.6 (8)  |
| F (15) -P (3) -F (13) | 175.6 (8) |
| F (14) -P (3) -F (18) | 98.8 (11) |
| F (15) -P (3) -F (18) | 91.5 (7)  |
| F (13) -P (3) -F (18) | 89.1 (8)  |



Table S-8 (cont.).

|                         |            |
|-------------------------|------------|
| F (14) - P (3) - F (17) | 90.3 (11)  |
| F (15) - P (3) - F (17) | 86.6 (7)   |
| F (13) - P (3) - F (17) | 92.2 (8)   |
| F (18) - P (3) - F (17) | 170.8 (11) |
| F (14) - P (3) - F (16) | 175.6 (11) |
| F (15) - P (3) - F (16) | 91.2 (8)   |
| F (13) - P (3) - F (16) | 84.5 (8)   |
| F (18) - P (3) - F (16) | 85.5 (10)  |
| F (17) - P (3) - F (16) | 85.5 (9)   |
| F (19) - P (4) - F (23) | 89.9 (5)   |
| F (19) - P (4) - F (20) | 90.2 (6)   |
| F (23) - P (4) - F (20) | 88.7 (5)   |
| F (19) - P (4) - F (21) | 178.3 (6)  |
| F (23) - P (4) - F (21) | 88.4 (5)   |
| F (20) - P (4) - F (21) | 89.8 (6)   |
| F (19) - P (4) - F (22) | 90.6 (5)   |
| F (23) - P (4) - F (22) | 89.8 (5)   |
| F (20) - P (4) - F (22) | 178.4 (5)  |
| F (21) - P (4) - F (22) | 89.4 (5)   |
| F (19) - P (4) - F (24) | 91.5 (5)   |
| F (23) - P (4) - F (24) | 177.8 (6)  |
| F (20) - P (4) - F (24) | 89.6 (5)   |
| F (21) - P (4) - F (24) | 90.2 (5)   |
| F (22) - P (4) - F (24) | 91.9 (5)   |

**Table S-9.** Anisotropic displacement parameters ( $\text{Å}^2 \times 10^3$ ) for  
 $[(\text{Fe}^{\text{III}}(\text{S}^{\text{Me}_2}\text{N}_4(\text{tren}))_2(\mu\text{-O}))(\text{PF}_6)_2 \cdot \text{MeCN} (\mathbf{3})$ . The anisotropic  
displacement factor exponent takes the form:  
 $-2 \pi^2 [ h^2 a^{*2} U_{11} + \dots + 2 h k a^* b^* U_{12} ]$

|        | U11    | U22    | U33    | U23     | U13     | U12     |
|--------|--------|--------|--------|---------|---------|---------|
| S (1)  | 43 (2) | 24 (2) | 44 (2) | 7 (2)   | 15 (2)  | 3 (2)   |
| S (2)  | 43 (2) | 30 (2) | 33 (2) | -6 (2)  | 6 (2)   | -10 (2) |
| S (3)  | 39 (2) | 28 (2) | 45 (2) | 11 (2)  | -5 (2)  | -3 (2)  |
| S (4)  | 58 (3) | 26 (2) | 44 (2) | -7 (2)  | -13 (2) | 9 (2)   |
| Fe (1) | 30 (1) | 17 (1) | 29 (1) | 1 (1)   | 3 (1)   | -1 (1)  |
| Fe (2) | 29 (1) | 20 (1) | 30 (1) | 2 (1)   | 2 (1)   | 1 (1)   |
| Fe (3) | 33 (1) | 23 (1) | 28 (1) | -1 (1)  | -1 (1)  | 2 (1)   |
| Fe (4) | 31 (1) | 19 (1) | 28 (1) | -1 (1)  | -1 (1)  | 1 (1)   |
| N (3)  | 22 (7) | 49 (7) | 32 (6) | -9 (5)  | 1 (5)   | -5 (5)  |
| N (2)  | 37 (7) | 20 (6) | 45 (7) | -5 (5)  | -6 (5)  | -11 (5) |
| N (1)  | 29 (7) | 26 (6) | 21 (5) | -7 (4)  | -5 (4)  | -8 (5)  |
| N (4)  | 5 (7)  | 41 (7) | 58 (7) | 7 (6)   | -5 (5)  | -9 (5)  |
| N (5)  | 34 (7) | 35 (6) | 32 (6) | 6 (5)   | 7 (5)   | 7 (5)   |
| N (6)  | 33 (7) | 22 (6) | 52 (7) | 9 (5)   | 6 (5)   | -7 (5)  |
| N (7)  | 20 (7) | 34 (6) | 32 (6) | -5 (5)  | 0 (5)   | -7 (5)  |
| N (8)  | 54 (9) | 36 (7) | 31 (6) | -18 (5) | 9 (6)   | -1 (6)  |
| N (9)  | 47 (9) | 40 (7) | 47 (7) | 0 (6)   | -8 (6)  | 7 (6)   |
| N (10) | 30 (7) | 42 (7) | 46 (7) | -9 (6)  | -6 (5)  | 1 (5)   |
| N (11) | 17 (7) | 27 (6) | 49 (7) | 0 (5)   | -3 (5)  | 2 (5)   |
| N (12) | 36 (8) | 24 (6) | 35 (6) | 13 (5)  | 2 (5)   | 1 (5)   |
| N (13) | 18 (7) | 29 (6) | 40 (6) | 2 (5)   | 0 (5)   | -2 (4)  |
| N (14) | 30 (7) | 16 (5) | 35 (6) | -3 (5)  | -10 (5) | 6 (4)   |
| N (15) | 8 (6)  | 36 (6) | 30 (6) | 2 (5)   | -10 (4) | 7 (4)   |
| N (16) | 39 (8) | 40 (7) | 27 (6) | -2 (5)  | 3 (5)   | -14 (5) |

|        |          |          |          |          |         |         |
|--------|----------|----------|----------|----------|---------|---------|
| N (17) | 57 (11)  | 70 (9)   | 63 (9)   | -3 (7)   | 25 (7)  | -31 (8) |
| N (18) | 131 (16) | 112 (14) | 37 (8)   | -9 (9)   | -11 (9) | 74 (12) |
| O (1)  | 34 (6)   | 11 (4)   | 58 (6)   | 5 (4)    | 0 (4)   | -9 (4)  |
| O (2)  | 36 (6)   | 15 (4)   | 44 (5)   | 5 (4)    | -5 (4)  | 6 (4)   |
| C (1)  | 63 (11)  | 37 (8)   | 27 (7)   | 6 (6)    | 1 (7)   | 13 (7)  |
| C (2)  | 56 (10)  | 23 (7)   | 48 (9)   | 13 (6)   | -1 (7)  | -28 (7) |
| C (3)  | 27 (8)   | 23 (6)   | 26 (7)   | 13 (5)   | -4 (5)  | 2 (5)   |
| C (4)  | 31 (9)   | 45 (9)   | 33 (7)   | 4 (7)    | 9 (6)   | -3 (6)  |
| C (5)  | 31 (10)  | 51 (9)   | 52 (9)   | 1 (7)    | 23 (7)  | -15 (7) |
| C (6)  | 31 (10)  | 46 (9)   | 43 (8)   | 24 (7)   | 12 (6)  | 6 (7)   |
| C (7)  | 60 (11)  | 33 (8)   | 50 (9)   | -8 (7)   | 25 (8)  | 6 (7)   |
| C (8)  | 65 (13)  | 44 (10)  | 72 (12)  | 5 (8)    | -20 (9) | 12 (8)  |
| C (9)  | 51 (12)  | 77 (13)  | 61 (11)  | -11 (10) | -14 (8) | 12 (9)  |
| C (10) | 35 (11)  | 28 (8)   | 126 (16) | -26 (9)  | 7 (10)  | -3 (7)  |
| C (11) | 36 (10)  | 14 (7)   | 96 (12)  | -10 (7)  | 33 (9)  | 7 (6)   |
| C (12) | 39 (10)  | 72 (11)  | 19 (7)   | -1 (7)   | 16 (6)  | 10 (8)  |
| C (13) | 41 (11)  | 78 (12)  | 64 (11)  | 44 (9)   | 17 (8)  | 32 (9)  |
| C (14) | 1 (8)    | 70 (10)  | 16 (6)   | 7 (6)    | 4 (5)   | 3 (6)   |
| C (15) | 35 (10)  | 60 (10)  | 20 (7)   | 6 (7)    | 10 (6)  | 16 (8)  |
| C (16) | 32 (10)  | 77 (12)  | 48 (9)   | -26 (8)  | -15 (7) | -11 (8) |
| C (17) | 51 (11)  | 45 (9)   | 46 (9)   | -2 (7)   | 14 (7)  | 13 (7)  |
| C (19) | 12 (9)   | 46 (9)   | 49 (9)   | -5 (7)   | 11 (6)  | 17 (6)  |
| C (20) | 52 (10)  | 45 (8)   | 21 (7)   | 15 (6)   | 4 (6)   | 16 (7)  |
| C (21) | 92 (13)  | 26 (8)   | 45 (9)   | 3 (7)    | 8 (8)   | 37 (8)  |
| C (22) | 93 (14)  | 14 (7)   | 57 (10)  | 1 (7)    | -8 (9)  | -9 (7)  |
| C (23) | 21 (9)   | 34 (8)   | 55 (9)   | 7 (7)    | 5 (6)   | 0 (6)   |
| C (24) | 42 (11)  | 38 (9)   | 87 (12)  | -24 (9)  | -3 (8)  | -7 (7)  |
| C (25) | 22 (8)   | 20 (7)   | 50 (8)   | -6 (6)   | 5 (6)   | -5 (5)  |
| C (26) | 44 (11)  | 79 (11)  | 11 (6)   | -3 (7)   | 13 (6)  | -9 (8)  |

|        |          |          |          |           |         |          |
|--------|----------|----------|----------|-----------|---------|----------|
| C (27) | 10 (10)  | 124 (15) | 45 (9)   | 21 (10)   | -12 (7) | -21 (8)  |
| C (28) | 35 (10)  | 74 (11)  | 39 (8)   | 22 (8)    | 16 (7)  | 25 (8)   |
| C (29) | 39 (10)  | 36 (8)   | 38 (8)   | 9 (6)     | 2 (7)   | 7 (6)    |
| C (30) | 77 (12)  | 70 (11)  | 11 (6)   | -5 (7)    | 10 (7)  | 25 (9)   |
| C (31) | 14 (10)  | 65 (11)  | 73 (11)  | 21 (9)    | -5 (7)  | -20 (7)  |
| C (32) | 100 (13) | 9 (6)    | 40 (8)   | 6 (6)     | -1 (8)  | 12 (7)   |
| C (33) | 71 (11)  | 16 (7)   | 45 (9)   | -2 (6)    | -22 (8) | -3 (7)   |
| C (34) | 56 (12)  | 29 (8)   | 88 (12)  | 3 (8)     | 12 (9)  | -5 (7)   |
| C (35) | 51 (10)  | 26 (7)   | 32 (7)   | -13 (6)   | 6 (6)   | 17 (6)   |
| C (36) | 11 (8)   | 40 (8)   | 30 (7)   | -10 (6)   | 1 (5)   | 1 (5)    |
| C (37) | 18 (8)   | 31 (7)   | 35 (7)   | -15 (6)   | 1 (6)   | -2 (5)   |
| C (38) | 43 (11)  | 51 (9)   | 46 (9)   | -32 (7)   | -18 (7) | -1 (7)   |
| C (39) | 26 (9)   | 32 (7)   | 43 (8)   | -18 (6)   | -21 (6) | 5 (6)    |
| C (40) | 24 (8)   | 29 (7)   | 35 (7)   | -6 (6)    | -10 (6) | 20 (6)   |
| C (41) | 75 (12)  | 6 (6)    | 67 (10)  | 8 (6)     | 12 (9)  | 1 (6)    |
| C (42) | 20 (8)   | 24 (7)   | 44 (8)   | 0 (6)     | 17 (6)  | 4 (6)    |
| C (43) | 60 (12)  | 62 (11)  | 40 (9)   | 9 (8)     | 7 (8)   | 8 (9)    |
| C (44) | 37 (9)   | 29 (7)   | 26 (7)   | -8 (6)    | -12 (6) | 23 (6)   |
| C (45) | 35 (10)  | 51 (10)  | 63 (10)  | 11 (8)    | 11 (7)  | -17 (7)  |
| C (46) | 20 (10)  | 51 (10)  | 52 (9)   | -10 (8)   | 5 (7)   | 12 (7)   |
| C (47) | 88 (14)  | 59 (11)  | 28 (8)   | -19 (7)   | 0 (8)   | 22 (9)   |
| C (48) | 88 (14)  | 29 (8)   | 28 (8)   | -8 (6)    | -17 (8) | 4 (8)    |
| F (1)  | 110 (10) | 211 (15) | 75 (7)   | 23 (9)    | 6 (7)   | 112 (10) |
| F (2)  | 75 (8)   | 40 (6)   | 175 (11) | 6 (6)     | 57 (7)  | 2 (5)    |
| F (3)  | 101 (10) | 269 (17) | 49 (6)   | 23 (9)    | 19 (6)  | 99 (10)  |
| F (4)  | 52 (7)   | 76 (7)   | 188 (12) | 25 (8)    | 61 (7)  | 12 (5)   |
| F (5)  | 50 (7)   | 108 (9)  | 251 (16) | -141 (10) | 2 (8)   | 1 (6)    |
| F (6)  | 100 (9)  | 65 (7)   | 161 (12) | -55 (7)   | -10 (8) | 20 (6)   |

|        |          |          |          |          |           |           |
|--------|----------|----------|----------|----------|-----------|-----------|
| F (7)  | 74 (8)   | 67 (7)   | 219 (15) | -59 (9)  | 5 (8)     | 19 (6)    |
| F (8)  | 3 (6)    | 102 (9)  | 215 (13) | 25 (8)   | -20 (6)   | 3 (5)     |
| F (9)  | 79 (9)   | 82 (8)   | 234 (16) | -96 (10) | -14 (9)   | -4 (6)    |
| F (10) | 64 (7)   | 70 (7)   | 133 (10) | -17 (6)  | 18 (6)    | 36 (5)    |
| F (11) | 62 (8)   | 234 (16) | 80 (8)   | 14 (9)   | 4 (6)     | -50 (8)   |
| F (12) | 76 (10)  | 340 (20) | 144 (12) | 153 (14) | -14 (8)   | -75 (11)  |
| F (13) | 141 (11) | 152 (12) | 104 (9)  | 37 (9)   | 40 (8)    | -69 (9)   |
| F (14) | 212 (17) | 280 (20) | 130 (12) | 61 (13)  | -112 (12) | -183 (16) |
| F (15) | 129 (11) | 126 (11) | 124 (10) | 67 (9)   | 56 (8)    | 1 (8)     |
| F (16) | 114 (12) | 198 (17) | 172 (15) | 31 (12)  | -59 (10)  | -28 (10)  |
| F (17) | 86 (9)   | 53 (7)   | 304 (19) | -33 (9)  | 70 (10)   | -5 (6)    |
| F (18) | 171 (14) | 40 (6)   | 370 (20) | -30 (10) | 176 (16)  | 16 (7)    |
| F (19) | 55 (7)   | 125 (9)  | 52 (6)   | -3 (6)   | 11 (5)    | 48 (6)    |
| F (20) | 75 (8)   | 91 (8)   | 77 (7)   | 11 (6)   | -38 (5)   | -21 (6)   |
| F (21) | 99 (8)   | 98 (8)   | 60 (6)   | -21 (6)  | 10 (5)    | 40 (6)    |
| F (22) | 34 (6)   | 68 (6)   | 89 (7)   | -7 (5)   | -20 (5)   | 1 (4)     |
| F (23) | 38 (6)   | 42 (5)   | 115 (8)  | 39 (5)   | 7 (5)     | -1 (4)    |
| F (24) | 50 (6)   | 50 (5)   | 109 (8)  | 32 (5)   | 10 (5)    | 14 (4)    |
| P (1)  | 32 (3)   | 42 (2)   | 45 (2)   | -9 (2)   | 1 (2)     | 0 (2)     |
| P (2)  | 36 (3)   | 30 (2)   | 51 (2)   | 6 (2)    | 5 (2)     | 1 (2)     |
| P (3)  | 44 (3)   | 33 (2)   | 49 (2)   | 9 (2)    | 5 (2)     | 3 (2)     |
| P (4)  | 39 (3)   | 31 (2)   | 40 (2)   | 5 (2)    | 1 (2)     | -3 (2)    |

---

**Table S-10.** Hydrogen coordinates ( $\times 10^4$ ) and isotropic displacement parameters ( $\text{\AA}^2 \times 10^3$ ) for  
 $[(\text{Fe}^{\text{III}}(\text{S}^{\text{Me}_2}\text{N}_4(\text{tren}))_2(\mu\text{-O}))(\text{PF}_6)_2 \cdot \text{MeCN}] (\mathbf{3})$

|        | x     | y    | z    | U (eq) |
|--------|-------|------|------|--------|
| H(1A)  | 2065  | 1627 | 5160 | 64     |
| H(1B)  | 1970  | 726  | 5036 | 64     |
| H(1C)  | 1094  | 1104 | 5293 | 64     |
| H(2A)  | 709   | 378  | 4444 | 63     |
| H(2B)  | -324  | 921  | 4425 | 63     |
| H(2C)  | -52   | 423  | 4788 | 63     |
| H(5A)  | -582  | 2288 | 5338 | 66     |
| H(5B)  | -579  | 1380 | 5222 | 66     |
| H(5C)  | -1393 | 1976 | 5026 | 66     |
| H(6A)  | -815  | 3379 | 5005 | 47     |
| H(6B)  | -1362 | 3166 | 4615 | 47     |
| H(7A)  | -1036 | 4439 | 4542 | 57     |
| H(7B)  | 35    | 4408 | 4784 | 57     |
| H(8A)  | -1049 | 3454 | 3522 | 73     |
| H(8B)  | -1542 | 3331 | 3918 | 73     |
| H(9A)  | -980  | 4519 | 3945 | 76     |
| H(9B)  | 40    | 4335 | 3711 | 76     |
| H(10A) | 2548  | 4905 | 4486 | 76     |
| H(10B) | 1659  | 4790 | 4790 | 76     |
| H(11A) | 684   | 5224 | 4283 | 58     |
| H(11B) | 1363  | 4716 | 4004 | 58     |
| H(12A) | 6817  | 4503 | 3886 | 65     |
| H(12B) | 6153  | 3817 | 4073 | 65     |
| H(12C) | 5961  | 4714 | 4187 | 65     |

Table S-10 (cont.).

|        |       |      |      |    |
|--------|-------|------|------|----|
| H(13A) | 5095  | 5618 | 3699 | 91 |
| H(13B) | 4660  | 5230 | 3324 | 91 |
| H(13C) | 5906  | 5336 | 3395 | 91 |
| H(16A) | 6985  | 3377 | 3336 | 78 |
| H(16B) | 6803  | 4291 | 3251 | 78 |
| H(16C) | 6403  | 3643 | 2960 | 78 |
| H(17A) | 5263  | 2152 | 3218 | 56 |
| H(17B) | 5470  | 2764 | 2893 | 56 |
| H(18A) | 3783  | 2640 | 2650 | 41 |
| H(18B) | 3989  | 1762 | 2795 | 41 |
| H(19A) | 1441  | 2636 | 3030 | 43 |
| H(19B) | 2023  | 2366 | 2664 | 43 |
| H(20A) | 2892  | 3596 | 2619 | 47 |
| H(20B) | 1663  | 3787 | 2673 | 47 |
| H(21A) | 3310  | 953  | 3732 | 65 |
| H(21B) | 4199  | 1228 | 3453 | 65 |
| H(22A) | 2629  | 1188 | 3095 | 66 |
| H(22B) | 1983  | 1650 | 3403 | 66 |
| H(23A) | 11515 | 4577 | 1122 | 54 |
| H(23B) | 10577 | 4469 | 822  | 54 |
| H(23C) | 11109 | 3714 | 1014 | 54 |
| H(24A) | 10855 | 5203 | 1646 | 84 |
| H(24B) | 9651  | 5088 | 1760 | 84 |
| H(24C) | 9916  | 5519 | 1382 | 84 |
| H(27A) | 11421 | 3500 | 2058 | 90 |
| H(27B) | 11872 | 4016 | 1729 | 90 |
| H(27C) | 11768 | 3082 | 1685 | 90 |
| H(28A) | 10336 | 2578 | 2143 | 59 |

Table S-10 (cont.).

|        |       |      |      |    |
|--------|-------|------|------|----|
| H(28B) | 10123 | 2005 | 1799 | 59 |
| H(29A) | 8867  | 1610 | 2187 | 45 |
| H(29B) | 8672  | 2479 | 2338 | 45 |
| H(30A) | 6441  | 3541 | 2319 | 63 |
| H(30B) | 7643  | 3322 | 2428 | 63 |
| H(31A) | 6818  | 2114 | 2292 | 61 |
| H(31B) | 6283  | 2456 | 1919 | 61 |
| H(32A) | 9099  | 1214 | 1494 | 60 |
| H(32B) | 8194  | 941  | 1204 | 60 |
| H(33A) | 6871  | 1573 | 1542 | 54 |
| H(33B) | 7545  | 1051 | 1832 | 54 |
| H(34A) | 4260  | 1084 | 494  | 86 |
| H(34B) | 5116  | 423  | 404  | 86 |
| H(34C) | 4382  | 782  | 81   | 86 |
| H(35A) | 6038  | 1095 | -262 | 54 |
| H(35B) | 6826  | 832  | 66   | 54 |
| H(35C) | 6888  | 1705 | -96  | 54 |
| H(38A) | 3829  | 2480 | -271 | 70 |
| H(38B) | 4513  | 1715 | -361 | 70 |
| H(38C) | 4979  | 2572 | -440 | 70 |
| H(39A) | 3901  | 3501 | 38   | 41 |
| H(39B) | 5049  | 3878 | -6   | 41 |
| H(40A) | 4367  | 4754 | 367  | 36 |
| H(40B) | 3616  | 4126 | 559  | 36 |
| H(41A) | 7282  | 4912 | 472  | 59 |
| H(41B) | 6270  | 4657 | 226  | 59 |
| H(42A) | 5655  | 5279 | 731  | 35 |
| H(42B) | 6385  | 4754 | 1002 | 35 |



Table S-10 (cont.).

|        |      |      |      |    |
|--------|------|------|------|----|
| H(43A) | 3282 | 3532 | 1075 | 64 |
| H(43B) | 3739 | 3515 | 1489 | 64 |
| H(44A) | 5111 | 4312 | 1354 | 37 |
| H(44B) | 4103 | 4704 | 1151 | 37 |
| H(45A) | 2304 | 1191 | 1740 | 74 |
| H(45B) | 2125 | 1472 | 2154 | 74 |
| H(45C) | 2906 | 755  | 2075 | 74 |
| H(47A) | 2725 | 6570 | 2152 | 87 |
| H(47B) | 2463 | 6119 | 1774 | 87 |
| H(47C) | 2026 | 5785 | 2153 | 87 |
| H(1D)  | 2083 | 3589 | 4806 | 41 |
| H(1E)  | 2849 | 3685 | 4507 | 41 |
| H(4A)  | 36   | 2570 | 3627 | 42 |
| H(4B)  | -585 | 2348 | 3952 | 42 |
| H(5D)  | 4511 | 2133 | 3860 | 40 |
| H(5E)  | 3482 | 2031 | 4043 | 40 |
| H(6C)  | 1972 | 4227 | 3213 | 42 |
| H(6D)  | 3056 | 4366 | 3080 | 42 |
| H(9C)  | 8195 | 2071 | 941  | 54 |
| H(9D)  | 9270 | 2164 | 1109 | 54 |
| H(10C) | 8014 | 4135 | 2015 | 47 |
| H(10D) | 6929 | 4142 | 1849 | 47 |
| H(13D) | 7675 | 3715 | 581  | 35 |
| H(13E) | 7014 | 3533 | 248  | 35 |
| H(16D) | 4101 | 2440 | 1020 | 42 |
| H(16E) | 4747 | 2547 | 1364 | 42 |

---
